# Supplementary material
Source: MDPI journal article supplement (https://www.mdpi.com/1999-4907/13/11/1779)
Supplement: s1 [file s1]

| STREET TREE STRUCTURE                                                                                                              |                                                                                                                                     |                                                          |      |               |              |                                                                        |                          |
|------------------------------------------------------------------------------------------------------------------------------------|-------------------------------------------------------------------------------------------------------------------------------------|----------------------------------------------------------|------|---------------|--------------|------------------------------------------------------------------------|--------------------------|
| Author                                                                                                                             | Title                                                                                                                               | Journal                                                  | Year | Study Area    |              |                                                                        | Theme/ Topic             |
|                                                                                                                                    |                                                                                                                                     |                                                          |      | Continent     | Country      | City/ State                                                            |                          |
| Abutaleb, Khaled; Freddy Mudede, Marko; Nkongolo, Nsalambi; Newete, Solomon W.                                                     | Estimating urban greenness index using remote sensing data: A case study of an affluent vs poor suburbs in the city of Johannesburg | The Egyptian Journal of Remote Sensing and Space Science | 2020 | Africa        | South Africa | Johannesburg                                                           | inventory method         |
| Appleton, Bonnie; Koci, Joel; French, Susan; Lestyan, Miklos; Harris, Roger                                                        | MYCORRHIZAL FUNGAL INOCULATION OF ESTABLISHED STREET TREES                                                                          | Journal of Arboriculture                                 | 2003 | North America | USA          | Richmond, VA; Chesapeake, VA                                           | establishment/ growth    |
| Aval, Josselin; Demuynck, Jean; Zenou, Emmanuel; Fabre, Sophie; Sheeren, David; Fauvel, Mathieu; Adeline, Karine; Briottet, Xavier | Detection of individual trees in urban alignment from airborne data and contextual information: A marked point process approach     | ISPRS Journal of Photogrammetry and Remote Sensing       | 2018 | Europe        | France       | Toulouse                                                               | inventory method         |
| Aval, Josselin; Demuynck, Jean; Zenou, Emmanuel; Fabre, Sophie; Sheeren, David; Fauvel, Mathieu; Adeline, Karine; Briottet, Xavier | Review of Urban Tree Inventory Methods Used to Collect Data at Single-Tree Level                                                    | Arboriculture & Urban Forestry                           | 2014 | n/a           | n/a          | n/a                                                                    | inventory method         |
| Berland, Adam, and Daniel A. Lange                                                                                                 | Google Street View Shows Promise for Virtual Street Tree Surveys.                                                                   | Urban Forestry & Urban Greening                          | 2017 | North America | USA          | Cincinnati, Ohio                                                       | inventory method         |
| Berland, Adam; Roman, Lara A.; Vogt, Jess                                                                                          | Can field crews telecommute? Varied data quality from citizen science tree inventories conducted using street-level imagery         | Forests                                                  | 2019 | North America | USA          | Chicago, IL                                                            | inventory method         |
| Bird, Jessica Platt, George Melika, James A. Nicholls, Graham N. Stone, and Eileen A. Buss                                         | Life History, Natural Enemies, and Management of <i>Disholcaspis quercusvirens</i> (Hymenoptera: Cynipidae) on Live Oak Trees.      | Journal of Economic Entomology                           | 2013 | North America | USA          | Penney Farms, Florida                                                  | disease/ pest management |
| Branson, Steve; Wegner, Jan Dirk; Hall, David; Lang, Nico; Schindler, Konrad; Perona, Pietro                                       | From Google Maps to a fine-grained catalog of street trees                                                                          | ISPRS Journal of Photogrammetry and Remote Sensing       | 2018 | North America | USA          | Pasadena, CA                                                           | inventory method         |
| Bühler, Oliver; Kristoffersen, Palle; Larsen, Søren Ugilt                                                                          | Growth of Street Trees in Copenhagen With Emphasis on the Effect of Different Establishment Concepts                                | Arboriculture & Urban Forestry                           | 2007 | Europe        | Denmark      | Copenhagen                                                             | establishment/ growth    |
| Bühler, Oliver; Nielsen, Christian Nørgård; Kristoffersen, Palle                                                                   | GROWTH AND PHENOLOGY OF ESTABLISHED TILIA CORDATA STREET TREES IN RESPONSE TO DIFFERENT IRRIGATION REGIMES                          | Arboriculture & Urban Forestry                           | 2006 | Europe        | Denmark      | Copenhagen                                                             | survival/ mortality      |
| Burger, David W; Prager, Todd E                                                                                                    | Deep-Rooted Trees for Urban Environments: Selection and Propagation                                                                 | Arboriculture & Urban Forestry                           | 2008 | North America | USA          | Modesto, Redwood City, Palo Alto, Berkeley, Sacramento & Sunnyvale, CA | establishment/ growth    |

| Author                                                                                                                            | Title                                                                                                                                                               | Journal                         | Year | Continent     | Country      | City/ State                | Theme/ Topic             |
|-----------------------------------------------------------------------------------------------------------------------------------|---------------------------------------------------------------------------------------------------------------------------------------------------------------------|---------------------------------|------|---------------|--------------|----------------------------|--------------------------|
| Cannavo, Patrice; Guenon, Rene; Galopin, Gilles; Vidal-Beaudet, Laure                                                             | Technosols made with various urban wastes showed contrasted performance for tree development during a 3-year experiment                                             | Environmental Earth Sciences    | 2018 | Europe        | France       | Angers                     | establishment/ growth    |
| Caplan, Joshua S.; Galanti, Russell C.; Olshevski, Stuart; Eisenman, Sasha W.                                                     | Water relations of street trees in green infrastructure tree trench systems                                                                                         | Urban Forestry & Urban Greening | 2019 | North America | USA          | Philadelphia, Pennsylvania | survival/ mortality      |
| Castro, Damián César, Carlos Agustín Alesso, Ariana Iaconis, María Carolina Cerino, and Marcela Buyatti.                          | Factors Influencing Street Tree Hazard Condition in Rafaela, Argentina                                                                                              | Revista Arvore                  | 2019 | South America | Argentina    | Rafaela                    | establishment/ growth    |
| Cekstere, Gunta; Nikodemus, Olgerts; Osvalde, Anita                                                                               | Toxic impact of the de-icing material to street greenery in Riga, Latvia                                                                                            | Urban Forestry & Urban Greening | 2008 | Europe        | Latvia       | Riga                       | survival/ mortality      |
| Cekstere, Gunta; Osvalde, Anita                                                                                                   | A study of chemical characteristics of soil in relation to street trees status in Riga (Latvia)                                                                     | Urban Forestry & Urban Greening | 2013 | Europe        | Latvia       | Riga                       | establishment/ growth    |
| Coetzee, J. C.; van der Linde, E. J.                                                                                              | Shot-Hole Reaction of Trichilia emetica in Response to Infection by Cocconia concentrica in South Africa                                                            | Plant Disease                   | 2012 | Africa        | South Africa | Mpumulanga                 | disease/ pest management |
| Conway, Tenley M.; Yip, Vivian                                                                                                    | Assessing residents' reactions to urban forest disservices: A case study of a major storm event                                                                     | Landscape and Urban Planning    | 2016 | North America | Canada       | Toronto, Ontario           | establishment/ growth    |
| Croeser, Thami; Ordóñez, Camilo; Threlfall, Caragh; Kendal, Dave; van der Ree, Rodney; Callow, David; Livesley, Stephen J.        | Patterns of tree removal and canopy change on public and private land in the City of Melbourne                                                                      | Sustainable Cities and Society  | 2020 | Oceania       | Australia    | Melbourne                  | survival/ mortality      |
| Crown, Crystal, Greer, Benjamin, Gift, Danielle, Watt, Fiona                                                                      | Every Tree Counts: Reflections on NYC's Third Volunteer Street Tree Inventory                                                                                       | Arboriculture & Urban Forestry  | 2018 | North America | USA          | New York, New York         | inventory method         |
| Dale, Adam G.; Frank, Steven D.                                                                                                   | The effects of urban warming on herbivore abundance and street tree condition                                                                                       | PloS One                        | 2014 | North America | USA          | Raleigh, North Carolina    | disease/ pest management |
| Dale, Adam G; Youngsteadt, Elsa; Frank, Steven D                                                                                  | Forecasting the Effects of Heat and Pests on Urban Trees: Impervious Surface Thresholds and the 'Pace-to-Plant' Technique                                           | Arboriculture & Urban Forestry  | 2016 | North America | USA          | Raleigh, North Carolina    | disease/ pest management |
| de la Mota Daniel, Francisco Javier; Day, Susan D.; Owen, James S.; Stewart, Ryan D.; Steele, Meredith K.; Sridhar, Venkataramana | Porous-permeable pavements promote growth and establishment and modify root depth distribution of Platanus × acerifolia (Aiton) Willd. in simulated urban tree pits | Urban Forestry & Urban Greening | 2018 | North America | USA          | Virginia Beach, Virginia   | establishment/ growth    |

| Author                                                                                                                                                                             | Title                                                                                                                                                                           | Journal                         | Year | Continent     | Country   | City/ State                     | Theme/ Topic             |
|------------------------------------------------------------------------------------------------------------------------------------------------------------------------------------|---------------------------------------------------------------------------------------------------------------------------------------------------------------------------------|---------------------------------|------|---------------|-----------|---------------------------------|--------------------------|
| Dmuchowski, Wojciech; Brągoszewska, Paulina; Gozdowski, Dariusz; Baczewska-Dabrowska, Aneta B.; Chojnacki, Tadeusz; Jozwiak, Adam; Swiezewska, Ewa; Gworek, Barbara; Suwara, Irena | Strategy of Ginkgo biloba L. in the mitigation of salt stress in the urban environment                                                                                          | Urban Forestry & Urban Greening | 2019 | Europe        | Poland    | Warsaw                          | survival/ mortality      |
| Duarte, V.; Silva, E. G.; Hass, I. C. R.; Bedendo, I. P.; Kitajima, E. W.                                                                                                          | First Report of a Group 16SrIII-B Phytoplasma Associated with Decline of China Tree in Brazil                                                                                   | Plant Disease                   | 2009 | South America | Brazil    | Porto Alegre                    | disease/ pest management |
| Fang, Fang; McNeil, Brenden E.; Warner, Timothy A.; Maxwell, Aaron E.; Dahle, Gregory A.; Eutsler, Earl; Li, Junli                                                                 | Discriminating tree species at different taxonomic levels using multi-temporal WorldView-3 imagery in Washington D.C., USA                                                      | Remote Sensing of Environment   | 2020 | North America | USA       | Washington, D.C.                | inventory method         |
| Fang, Fang; McNeil, Brenden; Warner, Timothy; Dahle, Gregory; Eutsler, Earl                                                                                                        | Street tree health from space? An evaluation using WorldView-3 data and the Washington D.C. Street Tree Spatial Database                                                        | Urban Forestry & Urban Greening | 2020 | North America | USA       | Washington, D.C.                | inventory method         |
| Fostad, Oddmund; Pedersen, Per Anker                                                                                                                                               | PROGENY TESTING IN STREET TREES SUBJECTED TO ROADSIDE SOIL POLLUTION                                                                                                            | Journal of Arboriculture        | 1998 | Europe        | Norway    | Oslo                            | survival/ mortality      |
| Frank, Steven D                                                                                                                                                                    | A Survey of Key Arthropod Pests on Common Southeastern Street Trees                                                                                                             | Arboriculture & Urban Forestry  | 2019 | North America | USA       | n=13 Southern states            | disease/ pest management |
| Gebert, L.L.; Coutts, A.M.; Tapper, N.J.                                                                                                                                           | The influence of urban canyon microclimate and contrasting photoperiod on the physiological response of street trees and the potential benefits of water sensitive urban design | Urban Forestry & Urban Greening | 2019 | Oceania       | Australia | Melbourne                       | survival/ mortality      |
| Gerhold, Henry D                                                                                                                                                                   | SERVICEBERRY CULTIVARS TESTED AS STREET TREES: INITIAL RESULTS                                                                                                                  | Journal of Arboriculture        | 1999 | North America | USA       | n=10 Pennsylvania, n=1 New York | establishment/ growth    |
| Gerhold, Henry D                                                                                                                                                                   | TREE LILAC CULTIVARS TESTED AS STREET TREES: INITIAL RESULTS                                                                                                                    | Journal of Arboriculture        | 1999 | North America | USA       | n=10 Pennsylvania, n=2 New York | establishment/ growth    |
| Gerhold, Henry D                                                                                                                                                                   | CRABAPPLE CULTIVARS TESTED AS STREET TREES: SECOND REPORT                                                                                                                       | Journal of Arboriculture        | 2000 | North America | USA       | Pennsylvania n=26, Maryland n=1 | establishment/ growth    |
| Gerhold, Henry D                                                                                                                                                                   | CALLERY PEAR CULTIVARS TESTED AS STREET TREES: SECOND REPORT                                                                                                                    | Journal of Arboriculture        | 2000 | North America | USA       | n=11 Pennsylvania               | establishment/ growth    |
| Gerhold, Henry D                                                                                                                                                                   | Tree Lilac (Syringa reticulata) Cultivars Tested As Street Trees: Second Report                                                                                                 | Arboriculture & Urban Forestry  | 2007 | North America | USA       | Pennsylvania n=12, New York=1   | establishment/ growth    |

| Author                                                                                                                                                               | Title                                                                                                                                              | Journal                         | Year | Continent     | Country   | City/ State                                               | Theme/ Topic          |
|----------------------------------------------------------------------------------------------------------------------------------------------------------------------|----------------------------------------------------------------------------------------------------------------------------------------------------|---------------------------------|------|---------------|-----------|-----------------------------------------------------------|-----------------------|
| Gerhold, Henry D                                                                                                                                                     | Crabapple Cultivars Tested As Street Trees: Third Report                                                                                           | Arboriculture & Urban Forestry  | 2007 | North America | USA       | Pennsylvania n=30, Maryland n=1                           | establishment/ growth |
| Gerhold, Henry D                                                                                                                                                     | Callery Pear Cultivars Tested As Street Trees: Final Report on a 12-year Study                                                                     | Arboriculture & Urban Forestry  | 2007 | North America | USA       | Pennsylvania n=11                                         | establishment/ growth |
| Gerhold, Henry D                                                                                                                                                     | Serviceberry Cultivars Tested as Street Trees: Second Report                                                                                       | Arboriculture & Urban Forestry  | 2008 | North America | USA       | Pennsylvania n=14, New York=2                             | establishment/ growth |
| Ghosh, Subhadip, Bryant C. Scharenbroch, Daniel Burcham, Lai Fern Ow, S. Shenbagavalli, and S. Mahimairaja                                                           | Influence of Soil Properties on Street Tree Attributes in Singapore                                                                                | Urban Ecosystems                | 2016 | Asia          | Singapore | Singapore                                                 | survival/ mortality   |
| Gillner, Sten; Korn, Sandra; Roloff, Andreas                                                                                                                         | Leaf-Gas Exchange of Five Tree Species at Urban Street Sites                                                                                       | Arboriculture & Urban Forestry  | 2015 | Europe        | Germany   | Dresden                                                   | establishment/ growth |
| Gillner, Sten; Vogt, Juliane; Roloff, Andreas                                                                                                                        | Climatic response and impacts of drought on oaks at urban and forest sites                                                                         | Urban Forestry & Urban Greening | 2013 | Europe        | Germany   | Dresden                                                   | establishment/ growth |
| Grabosky, J.; Bassuk, N.                                                                                                                                             | Seventeen years' growth of street trees in structural soil compared with a tree lawn in New York City                                              | Urban Forestry & Urban Greening | 2016 | North America | USA       | New York, New York                                        | establishment/ growth |
| Grabosky, Jason; Bassuk, Nina; Marranca, B Z                                                                                                                         | PRELIMINARY FINDINGS FROM MEASURING STREET TREE SHOOT GROWTH IN TWO SKELETAL SOIL INSTALLATIONS COMPARED TO TREE LAWN PLANTINGS                    | Journal of Arboriculture        | 2002 | North America | USA       | Brooklyn and Ithaca New york                              | establishment/ growth |
| Grabosky, Jason; Gucunski, Nenad                                                                                                                                     | Modelling the influence of root position and growth on pavement tensile crack failure when occurring under three thicknesses of asphaltic concrete | Urban Forestry & Urban Greening | 2019 | n/a           | n/a       | n/a                                                       | establishment/ growth |
| Hallett, Richard; Johnson, Michelle L.; Sonti, Nancy F.                                                                                                              | Assessing the tree health impacts of salt water flooding in coastal cities: A case study in New York City                                          | Landscape and Urban Planning    | 2018 | North America | USA       | New York, New York                                        | survival/ mortality   |
| Hauer, Richard J.; Koeser, Andrew K.; Parbs, Stephani; Kringer, Jim; Krouse, Randy; Ottman, Ken; Miller, Robert W.; Sivyer, David; Timilsina, Nilesh; Werner, Les P. | Long-term effects and development of a tree preservation program on tree condition, survival, and growth                                           | Landscape and Urban Planning    | 2020 | North America | USA       | Milwaukee, WI                                             | survival/ mortality   |
| Hilbert, Deborah R.; North, Eric A.; Hauer, Richard J.; Koeser, Andrew K.; McLean, Drew C.; Northrop, Robert J.; Andreu, Michael; Parbs, Stephani                    | Predicting trunk flare diameter to prevent tree damage to infrastructure                                                                           | Urban Forestry & Urban Greening | 2020 | North America | USA       | Milwaukee, WI, Minneapolis, MN, Saint Paul, MN, Tampa, FL | establishment/ growth |

| Author                                                                                                                                                                        | Title                                                                                                              | Journal                                              | Year | Continent     | Country     | City/ State            | Theme/ Topic             |
|-------------------------------------------------------------------------------------------------------------------------------------------------------------------------------|--------------------------------------------------------------------------------------------------------------------|------------------------------------------------------|------|---------------|-------------|------------------------|--------------------------|
| Husain, Arshad; Vaishya, Rakesh Chandra                                                                                                                                       | Detection and thinning of street trees for calculation of morphological parameters using mobile laser scanner data | Remote Sensing Applications: Society and Environment | 2019 | North America | Canada      | Ontario                | inventory method         |
| Jim, C.Y.; Liu, Howard H.T.                                                                                                                                                   | Storm damage on urban trees in Guangzhou, China                                                                    | Landscape and Urban Planning                         | 1997 | Asia          | China       | Guangzhou              | inventory method         |
| Joyner, Jessica Lee; Kerwin, Jordan; Deeb, Maha; Lozefski, George; Prithiviraj, Bharath; Paltseva, Anna; McLaughlin, John; Groffman, Peter; Cheng, Zhongqi; Muth, Theodore R. | Green Infrastructure Design Influences Communities of Urban Soil Bacteria                                          | Frontiers in Microbiology                            | 2019 | North America | USA         | New York, New York     | establishment/ growth    |
| Jutras, P.; Prasher, S.O.; Mehuys, G.R.                                                                                                                                       | Artificial neural network prediction of street tree growth patterns                                                | Transactions of the ASABE                            | 2010 | North America | Canada      | Montreal, Quebec       | inventory method         |
| Jutras, Pierre; Prasher, Shiv O.; Mehuys, Guy R.                                                                                                                              | Prediction of street tree morphological parameters using artificial neural networks                                | Computers and Electronics in Agriculture             | 2009 | North America | Canada      | Montreal, Quebec       | inventory method         |
| Jutras, Pierre; Prasher, Shiv O; Dutilleul, Pierre                                                                                                                            | Identification of Significant Street Tree Inventory Parameters Using Multivariate Statistical Analyses             | Arboriculture & Urban Forestry                       | 2009 | North America | Canada      | Montreal, Quebec       | inventory method         |
| Jutras, Pierre; Prasher, Shiv O; Mehuys, Guy R                                                                                                                                | Appraisal of Key Abiotic Parameters Affecting Street Tree Growth                                                   | Arboriculture & Urban Forestry                       | 2010 | North America | Canada      | Montreal, Quebec       | establishment/ growth    |
| Kämäräinen, Antti S; Riikonen, Anu; Simojoki, Asko; Lindén, Leena                                                                                                             | A Case Study of Street Tree Soil Aeration in Two Different Soil Types                                              | Arboriculture & Urban Forestry                       | 2018 | Europe        | Finland     | Helsinki               | establishment/ growth    |
| Kang, Zhizhong; Yang, Juntao                                                                                                                                                  | A probabilistic graphical model for the classification of mobile LiDAR point clouds                                | ISPRS Journal of Photogrammetry and Remote Sensing   | 2018 | Asia          | China       | Wuhan                  | inventory method         |
| Kargar, Maryam; Clark, O. Grant; Hendershot, William H.; Jutras, Pierre; Prasher, S.O.                                                                                        | Bioavailability of sodium and trace metals under direct and indirect effects of compost in urban soils             | Journal of Environmental Quality                     | 2016 | North America | Canada      | Montreal, Quebec       | establishment/ growth    |
| Kargar, Maryam; Clark, O. Grant; Hendershot, William H.; Jutras, Pierre; Prasher, Shiv O.                                                                                     | Immobilization of trace metals in contaminated urban soil amended with compost and biochar                         | Water, Air, and Soil Pollution                       | 2015 | North America | Canada      | Montreal, Quebec       | establishment/ growth    |
| Kim, Hyun-Jun; Lee, Sang-Hyun                                                                                                                                                 | Developing the volume models for 5 major species of street trees in Gwangju metropolitan city of Korea             | Urban Forestry & Urban Greening                      | 2016 | Asia          | South Korea | Gwangju                | inventory method         |
| Kim, M.-S.; Klopfenstein, N. B.; Hanna, J. W.; Cannon, P.; Medel, R.; López, A.                                                                                               | First Report of Armillaria Root Disease Caused by Armillaria tabescens on Araucaria araucana in Veracruz, Mexico   | Plant Disease                                        | 2010 | North America | Mexico      | Xalapa, Veracruz       | disease/ pest management |
| Ko, Yekang; Lee, Jun-Hak; McPherson, E. Gregory; Roman, Lara A.                                                                                                               | Factors affecting long-term mortality of residential shade trees: Evidence from Sacramento, California             | Urban Forestry & Urban Greening                      | 2015 | North America | USA         | Sacramento, California | survival/ mortality      |

| Author                                                                                             | Title                                                                                                                                                   | Journal                                                  | Year | Continent     | Country   | City/ State                                             | Theme/ Topic          |
|----------------------------------------------------------------------------------------------------|---------------------------------------------------------------------------------------------------------------------------------------------------------|----------------------------------------------------------|------|---------------|-----------|---------------------------------------------------------|-----------------------|
| Koch, Frank H.; Ambrose, Mark J.; Yemshanov, Denys; Wiseman, P. Eric; Cowett, F.D.                 | Modeling urban distributions of host trees for invasive forest insects in the eastern and central USA: A three-step approach using field inventory data | Forest Ecology and Management                            | 2018 | North America | USA       | n=842 towns                                             | inventory method      |
| Koeser, Andrew K; McLean, Drew C; Hasing, Gitta; Allison, R Bruce                                  | Frequency, Severity, and Detectability of Internal Trunk Decay of Street Tree Quercus spp. in Tampa, Florida, U.S.                                      | Arboriculture & Urban Forestry                           | 2016 | North America | USA       | Tampa, Florida                                          | survival/ mortality   |
| Koeser, Andrew; Hauer, Richard; Norris, Kelly; Krouse, Randy                                       | Factors influencing long-term street tree survival in Milwaukee, WI, USA                                                                                | Urban Forestry & Urban Greening                          | 2013 | North America | USA       | Milwaukee, Wisconsin                                    | survival/ mortality   |
| Lantini, L.; Alani, A.M.; Giannakis, I.; Benedetto, A.; Tosti, Fabio                               | Application of ground penetrating radar for mapping tree root system architecture and mass density of street trees                                      | Advances in Transportation Studies                       | 2019 | n/a           | n/a       | n/a                                                     | inventory method      |
| Larkin, Andrew; Hystad, Perry                                                                      | Evaluating street view exposure measures of visible green space for health research                                                                     | Journal of Exposure Science & Environmental Epidemiology | 2019 | n/a           | n/a       | n/a                                                     | inventory method      |
| Laumer, Daniel; Lang, Nico; van Doorn, Natalie; Mac Aodha, Oisin; Perona, Pietro; Wegner, Jan Dirk | Geocoding of trees from street addresses and street-level images                                                                                        | ISPRS Journal of Photogrammetry and Remote Sensing       | 2020 | North America | USA       | n= 5 cities California                                  | inventory method      |
| Lee, Jun-Hak; Ko, Yekang; McPherson, E. Gregory                                                    | The feasibility of remotely sensed data to estimate urban tree dimensions and biomass                                                                   | Urban Forestry & Urban Greening                          | 2016 | North America | USA       | Sacramento, California                                  | inventory method      |
| Leers, M; Moore, G M; May, P B                                                                     | Assessment of Six Indicators of Street Tree Establishment in Melbourne, Australia                                                                       | Arboriculture & Urban Forestry                           | 2018 | Oceania       | Australia | Melbourne                                               | establishment/ growth |
| Lesser, Lawrence M                                                                                 | HARDSCAPE DAMAGE BY TREE ROOTS                                                                                                                          | Journal of Arboriculture                                 | 2001 | North America | USA       | Temple City, Monrovia, and Rancho Cucamonga, California | establishment/ growth |
| Li, Lin; Li, Dalin; Zhu, Haihong; Li, You                                                          | A dual growing method for the automatic extraction of individual trees from mobile laser scanning data                                                  | ISPRS Journal of Photogrammetry and Remote Sensing       | 2016 | Asia          | China     | Wuhan                                                   | inventory method      |
| Li, Qiuji; Yuan, Pengcheng; Liu, Xu; Zhou, Hongping                                                | Street tree segmentation from mobile laser scanning data                                                                                                | International Journal of Remote Sensing                  | 2020 | n/a           | n/a       | n/a                                                     | inventory method      |
| Li, Xiaojiang; Ratti, Carlo                                                                        | Mapping the spatial distribution of shade provision of street trees in Boston using Google Street View panoramas                                        | Urban Forestry & Urban Greening                          | 2018 | North America | USA       | Boston, Massachusetts                                   | inventory method      |

| Author                                                                          | Title                                                                                                                                                                                   | Journal                                               | Year | Continent     | Country   | City/ State                                        | Theme/ Topic          |
|---------------------------------------------------------------------------------|-----------------------------------------------------------------------------------------------------------------------------------------------------------------------------------------|-------------------------------------------------------|------|---------------|-----------|----------------------------------------------------|-----------------------|
| Limoges, Sophie; Pham, Thi-Thanh-Hien; Apparicio, Philippe                      | Growing on the street: Multilevel correlates of street tree growth in Montreal                                                                                                          | Urban Forestry & Urban Greening                       | 2018 | North America | Canada    | Montreal, Quebec                                   | establishment/ growth |
| Loh, Felix C.W.; Grabosky, Jason C.; Bassuk, Nina L.                            | Growth response of Ficus benjamina to limited soil volume and soil dilution in a skeletal soil container study                                                                          | Urban Forestry & Urban Greening                       | 2003 | North America | USA       | Ithaca, NY                                         | establishment/ growth |
| Lucke, T.; Beecham, S.                                                          | An infiltration approach to reducing pavement damage by street trees                                                                                                                    | Science of the Total Environment                      | 2019 | Oceania       | Australia | Queensland                                         | establishment/ growth |
| Luley, Christopher J; Nowak, David J; Greenfield, Eric J                        | Frequency and Severity of Trunk Decay in Street Tree Maples in Four New York Cities                                                                                                     | Arboriculture & Urban Forestry                        | 2009 | North America | USA       | Albany, Buffalo, Rochester, and Syracuse, New York | survival/ mortality   |
| Luley, Christopher J; Sisinni, Susan; Pleninger, Andrew                         | THE EFFECT OF PRUNING ON SERVICE REQUESTS, BRANCH FAILURES, AND PRIORITY MAINTENANCE IN THE CITY OF ROCHESTER, NEW YORK, U.S.                                                           | Journal of Arboriculture                              | 2002 | North America | USA       | Rochester, NY                                      | establishment/ growth |
| Maco, Scott E; McPherson, E Gregory                                             | ASSESSING CANOPY COVER OVER STREETS AND SIDEWALKS IN STREET TREE POPULATIONS                                                                                                            | Journal of Arboriculture                              | 2002 | North America | USA       | Davis, California                                  | inventory method      |
| Magarik, Yasha A.S.; Roman, Lara A.; Henning, Jason G.                          | How should we measure the DBH of multi-stemmed urban trees?                                                                                                                             | Urban Forestry & Urban Greening                       | 2020 | North America | USA       | Philadelphia, Pennsylvania                         | inventory method      |
| Marion, Lena; Gričar, Jožica; Oven, Primož                                      | Wood formation in urban Norway maple trees studied by the micro-coring method                                                                                                           | Dendrochronologia                                     | 2007 | Europe        | Slovenia  | Ljubljana                                          | establishment/ growth |
| Martin, Meredith P.; Simmons, Cary; Ashton, Mark S.                             | Survival is not enough: The effects of microclimate on the growth and health of three common urban tree species in San Francisco, California                                            | Urban Forestry & Urban Greening                       | 2016 | North America | USA       | San Francisco, California                          | survival/ mortality   |
| Matsushima, U.; Kardjilov, N.; Hilger, A.; Manke, I.; Shono, H.; Herppich, W.B. | Visualization of water usage and photosynthetic activity of street trees exposed to 2ppm of SO <sub>2</sub> —A combined evaluation by cold neutron and chlorophyll fluorescence imaging | Nuclear Instruments and Methods in Physics Research A | 2009 | n/a           | n/a       | n/a                                                | establishment/ growth |
| McPherson, E Gregory                                                            | EXPENDITURES ASSOCIATED WITH CONFLICTS BETWEEN STREET TREE ROOT GROWTH AND HARDSCAPE IN CALIFORNIA, UNITED STATES                                                                       | Journal of Arboriculture                              | 2000 | North America | USA       | 18 California cities                               | establishment/ growth |

| Author                                                                                                                                                    | Title                                                                                                                                                                                            | Journal                         | Year | Continent     | Country     | City/ State                                                                                                                                                                                                                                   | Theme/ Topic             |
|-----------------------------------------------------------------------------------------------------------------------------------------------------------|--------------------------------------------------------------------------------------------------------------------------------------------------------------------------------------------------|---------------------------------|------|---------------|-------------|-----------------------------------------------------------------------------------------------------------------------------------------------------------------------------------------------------------------------------------------------|--------------------------|
| McPherson, E Gregory                                                                                                                                      | Selecting Reference Cities for i-Tree Streets                                                                                                                                                    | Arboriculture & Urban Forestry  | 2010 | North America | USA         | Albuquerque, NM; Berkeley, CA; Boise, ID; Charleston, SC; Charlotte, NC; Claremont, CA; Fort Collins, CO; Glendale, AZ; Honolulu, HI; Indianapolis, IN; Minneapolis, MN; Modesto, CA; Queens, NY; Santa Monica, CA; Longview, WA; Orlando, FL | inventory method         |
| McPherson, E Gregory                                                                                                                                      | Monitoring Million Trees LA: Tree Performance During the Early Years and Future Benefits                                                                                                         | Arboriculture & Urban Forestry  | 2014 | North America | USA         | Los Angeles, California                                                                                                                                                                                                                       | survival/ mortality      |
| Mercader, Rodrigo J.; McCullough, Deborah G.; Storer, Andrew J.; Bedford, John M.; Heyd, Robert; Siegert, Nathan W.; Katovich, Steven; Poland, Therese M. | Estimating local spread of recently established emerald ash borer, <i>Agrilus planipennis</i> , infestations and the potential to influence it with a systemic insecticide and girdled ash trees | Forest Ecology and Management   | 2016 | North America | USA         | St. Ignace, MI; Moran, MI                                                                                                                                                                                                                     | disease/ pest management |
| Migliorini, Duccio; Khdiar, Mohammed Y.; Padrón, Cristina Rodríguez; Vivas, María; Barber, Paul A.; Hardy, Giles E. St J.; Burgess, Treena I.             | Extending the host range of <i>Phytophthora multivora</i> , a pathogen of woody plants in horticulture, nurseries, urban environments and natural ecosystems                                     | Urban Forestry & Urban Greening | 2019 | Oceania       | Australia   | Perth, WA                                                                                                                                                                                                                                     | disease/ pest management |
| Mikami, Osamu K.; Takamatsu, Misaki; Yarita, Rika                                                                                                         | Repurposing a traditional Japanese method of pest control for wintering pine moths, <i>Komotrapp</i> , for use against summer and winter populations of fall webworms                            | PeerJ                           | 2020 | Asia          | Japan       | Hakodate City                                                                                                                                                                                                                                 | disease/ pest management |
| Morgenroth, Justin                                                                                                                                        | A Review of Root Barrier Research                                                                                                                                                                | Arboriculture & Urban Forestry  | 2008 | n/a           | n/a         | n/a                                                                                                                                                                                                                                           | establishment/ growth    |
| Morgenroth, Justin                                                                                                                                        | Root Growth Response of <i>Platanus orientalis</i> to Porous Pavements                                                                                                                           | Arboriculture & Urban Forestry  | 2011 | Oceania       | New Zealand | Christchurch                                                                                                                                                                                                                                  | establishment/ growth    |
| Morgenroth, Justin; Visser, Rien                                                                                                                          | Aboveground Growth Response of <i>Platanus orientalis</i> to Porous Pavements                                                                                                                    | Arboriculture & Urban Forestry  | 2011 | Oceania       | New Zealand | Christchurch                                                                                                                                                                                                                                  | establishment/ growth    |



| Author                                                                              | Title                                                                                                                    | Journal                         | Year | Continent     | Country   | City/ State                                                                                 | Theme/ Topic             |
|-------------------------------------------------------------------------------------|--------------------------------------------------------------------------------------------------------------------------|---------------------------------|------|---------------|-----------|---------------------------------------------------------------------------------------------|--------------------------|
| Mullaney, Jennifer; Trueman, Stephen J.; Lucke, Terry; Bai, Shahla Hosseini         | The effect of permeable pavements with an underlying base layer on the ecophysiological status of urban trees            | Urban Forestry & Urban Greening | 2015 | Oceania       | Australia | University of the Sunshine Coast, Queensland                                                | establishment/ growth    |
| Nichols, Peter; McCallum, Adrian; Lucke, Terry                                      | Using ground penetrating radar to locate and categorise tree roots under urban pavements                                 | Urban Forestry & Urban Greening | 2017 | Oceania       | Australia | Bli Bli                                                                                     | establishment/ growth    |
| Nielsen, Christian N; Bühler, Oliver; Kristoffersen, Palle                          | Soil Water Dynamics and Growth of Street and Park Trees                                                                  | Arboriculture & Urban Forestry  | 2007 | Europe        | Denmark   | Copenhagen                                                                                  | establishment/ growth    |
| Nischwitz, C.; Newcombe, G.                                                         | First Report of Powdery Mildew ( <i>Sawadaea bicornis</i> ) on Norway Maple ( <i>Acer platanoides</i> ) in North America | Plant Disease                   | 2003 | North America | USA       | Moscow and Pullman (Idaho-Washington border).                                               | disease/ pest management |
| Nordbo, Annika; Karsisto, Petteri; Matikainen, Leena; Wood, Curtis R.; Järvi, Leena | Urban surface cover determined with airborne lidar at 2m resolution – Implications for surface energy balance modelling  | Urban Climate                   | 2015 | Europe        | Finland   | Helsinki                                                                                    | inventory method         |
| North, Eric A.; D’Amato, Anthony W.; Russell, Matthew B.; Johnson, Gary R.          | The influence of sidewalk replacement on urban street tree growth                                                        | Urban Forestry & Urban Greening | 2017 | North America | USA       | St. Paul and Minneapolis                                                                    | establishment/ growth    |
| North, Eric A.; Johnson, Gary R.; Burk, Thomas E.                                   | Trunk flare diameter predictions as an infrastructure planning tool to reduce tree and sidewalk conflicts                | Urban Forestry & Urban Greening | 2015 | North America | USA       | Minnesota: Crookston, Hendricks, Hibbing, Hutchinson, Morris, and Rochester                 | establishment/ growth    |
| Nowak, David J; Walton, Jeffrey T; Baldwin, James; Bond, Jerry                      | Simple Street Tree Sampling                                                                                              | Arboriculture & Urban Forestry  | 2015 | North America | USA       | Buffalo, NY; Lansing, MI; Livonia, MI; Parkersburg, WV; Syracuse, NY; Wilmington, Delaware. | inventory method         |
| Ordóñez, Camilo; Sabetski, Vadim; Millward, Andrew A; Grant, Amber; Urban, James    | The Influence of Abiotic Factors on Street Tree Condition and Mortality in a Commercial-Retail Streetscape               | Arboriculture & Urban Forestry  | 2018 | North America | Canada    | Toronto, Ontario                                                                            | survival/ mortality      |
| Ordóñez-Barona, Camilo; Sabetski, Vadim; Millward, Andrew A.; Steenberg, James      | De-icing salt contamination reduces urban tree performance in structural soil cells                                      | Environmental Pollution         | 2018 | North America | Canada    | Toronto, Ontario                                                                            | survival/ mortality      |

| Author                                                                                                                                                               | Title                                                                                                             | Journal                                                    | Year | Continent     | Country  | City/ State                          | Theme/ Topic             |
|----------------------------------------------------------------------------------------------------------------------------------------------------------------------|-------------------------------------------------------------------------------------------------------------------|------------------------------------------------------------|------|---------------|----------|--------------------------------------|--------------------------|
| Pauleit, Stephan; Jones, Nerys; Garcia-Martin, Gemma; Garcia-Valdecantos, Jose Luis; Rivière, Louis Marie; Vidal-Beaudet, Laure; Bodson, Monique; Randrup, Thomas B. | Tree establishment practice in towns and cities – Results from a European survey                                  | Urban Forestry & Urban Greening                            | 2002 | Europe        | multiple | Five largest cities of each country  | establishment/ growth    |
| Pedlar, John H.; Daniel W. McKenney, Denys Yemshanov, and Emily S. Hope                                                                                              | Potential Economic Impacts of the Asian Longhorned Beetle (Coleoptera: Cerambycidae) in Eastern Canada            | Journal of Economic Entomology                             | 2020 | North America | Canada   | n/a                                  | disease/ pest management |
| Pedlar, John H.; McKenney, Daniel W.; Allen, Darren; Lawrence, Kevin; Lawrence, Glenn; Campbell, Kathy                                                               | A street tree survey for canadian communities: Protocol and early results                                         | Forestry Chronicle                                         | 2013 | North America | Canada   | 895 locations                        | inventory method         |
| Peper, Paula J; McPherson, E Gregory; Mori, Sylvia M                                                                                                                 | EQUATIONS FOR PREDICTING DIAMETER, HEIGHT, CROWN WIDTH, AND LEAF AREA OF SAN JOAQUIN VALLEY STREET TREES          | Journal of Arboriculture                                   | 2001 | North America | USA      | Modesto and Santa Monica, California | inventory method         |
| Peper, Paula, McPherson, E.G., Mori Sylvia                                                                                                                           | EQUATIONS FOR PREDICTING DIAMETER, HEIGHT, CROWN WIDTH, AND LEAF AREA OF SAN JOAQUIN VALLEY STREET TREES          | Journal of Arboriculture                                   | 2001 | North America | USA      | Santa Monica, California             | inventory method         |
| Philip, Elizabeth; Noor Azlin, Y.                                                                                                                                    | Measurement of soil compaction tolerance of <i>Lagestromia speciosa</i> (L.) Pers. using chlorophyll fluorescence | Urban Forestry & Urban Greening                            | 2005 | Asia          | Malaysia | Shah Alam                            | establishment/ growth    |
| Pilant, Andrew; Endres, Keith; Rosenbaum, Daniel; Gundersen, Gillian                                                                                                 | US EPA EnviroAtlas meter-scale urban land cover (MULC): 1-m pixel land cover class definitions and guidance       | Remote Sensing                                             | 2020 | North America | USA      | n/a                                  | inventory method         |
| Poracsky, Joseph; Scott, Mark                                                                                                                                        | INDUSTRIAL-AREA STREET TREES IN PORTLAND, OREGON                                                                  | Journal of Arboriculture                                   | 1999 | North America | USA      | Portland, Oregon                     | inventory method         |
| Quénéa, Katell; Andrianjara, Iry; Rankovic, Aleksandar; Gan, Erika; Aubry, Emmanuel; Lata, Jean-Christophe; Barot, Sébastien; Castrec-Rouelle, Maryse                | Influence of the residence time of street trees and their soils on trace element contamination in Paris (France)  | Environmental Science and Pollution Research International | 2019 | Europe        | France   | Paris                                | establishment/ growth    |

| Author                                                                                                                                                                        | Title                                                                                                                           | Journal                         | Year | Continent     | Country      | City/ State                                                                                                               | Theme/ Topic          |
|-------------------------------------------------------------------------------------------------------------------------------------------------------------------------------|---------------------------------------------------------------------------------------------------------------------------------|---------------------------------|------|---------------|--------------|---------------------------------------------------------------------------------------------------------------------------|-----------------------|
| Richardson, Emma; Shackleton, Charlie M.                                                                                                                                      | The extent and perceptions of vandalism as a cause of street tree damage in small towns in the Eastern Cape, South Africa       | Urban Forestry & Urban Greening | 2014 | Africa        | South Africa | Pearston, Somerset East, Cookhouse, Bedford, Adelaide, Fort Beaufort, Paterson, Alexandria, Bathurst, Grahamstown, Peddie | survival/ mortality   |
| Riikonen, Anu; Lindén, Leena; Pulkkinen, Minna; Nikinmaa, Eero                                                                                                                | Post-transplant crown allometry and shoot growth of two species of street trees                                                 | Urban Forestry & Urban Greening | 2011 | n/a           | n/a          | n/a                                                                                                                       | establishment/ growth |
| Roberts, John; Koeser, Andrew; Abd-Elrahman, Amr; Wilkinson, Benjamin; Hansen, Gail; Landry, Shawn; Perez, Ali                                                                | Mobile terrestrial photogrammetry for street tree mapping and measurements                                                      | Forests                         | 2019 | North America | USA          | Wimauma, Florida                                                                                                          | inventory method      |
| Roman, Lara A.; Scatena, Frederick N.                                                                                                                                         | Street tree survival rates: Meta-analysis of previous studies and application to a field survey in Philadelphia, PA, USA        | Urban Forestry & Urban Greening | 2011 | North America | USA          | Philadelphia, PA                                                                                                          | survival/ mortality   |
| Roman, Lara A.; Scharenbroch, Bryant C.; Östberg, Johan P.A.; Mueller, Lee S.; Henning, Jason G.; Koeser, Andrew K.; Sanders, Jessica R.; Betz, Daniel R.; Jordan, Rebecca C. | Data quality in citizen science urban tree inventories                                                                          | Urban Forestry & Urban Greening | 2017 | multiple      | multiple     | Malmo; Lombard, Illinois, Grand Rapids, Michigan, Philadelphia, Pennsylvania                                              | inventory method      |
| Roman, Lara A.; Walker, Lindsey A.; Martineau, Catherine M.; Muffly, David J.; MacQueen, Susan A.; Harris, Winnie                                                             | Stewardship matters: Case studies in establishment success of urban trees                                                       | Urban Forestry & Urban Greening | 2015 | North America | USA          | East Palo Alto, CA; Philadelphia, PA                                                                                      | establishment/ growth |
| Rugel, Emily J.; Henderson, Sarah B.; Carpiano, Richard M.; Brauer, Michael                                                                                                   | Beyond the Normalized Difference Vegetation Index (NDVI): Developing a Natural Space Index for population-level health research | Environmental Research          | 2017 | North America | Canada       | Vancouver, British Columbia                                                                                               | inventory method      |
| Schollaert, Claire; Ackley, Robert C.; DeSantis, Andy; Polka, Erin; Scammell, Madeleine K.                                                                                    | Natural gas leaks and tree death: A first-look case-control study of urban trees in Chelsea, MA USA                             | Environmental Pollution         | 2020 | North America | USA          | Chelsea, MA                                                                                                               | survival/ mortality   |
| Seguin, Rose; Kargar, Maryam; Prasher, Shiv O.; Grant Clark, O.; Jutras, Pierre                                                                                               | Remediating Montreals Tree Pit Soil Applying an Ash Tree-Derived Biochar                                                        | Water, Air, and Soil Pollution  | 2018 | North America | Canada       | Montreal, Quebec                                                                                                          | establishment/ growth |

| Author                                                                                       | Title                                                                                                                                                    | Journal                         | Year | Continent     | Country | City/ State                                                                                                                                                  | Theme/ Topic                |
|----------------------------------------------------------------------------------------------|----------------------------------------------------------------------------------------------------------------------------------------------------------|---------------------------------|------|---------------|---------|--------------------------------------------------------------------------------------------------------------------------------------------------------------|-----------------------------|
| Shatz, Andrew J.; Rogan, John; Sangermano, Florencia; Ogneva-Himmelberger, Yelena; Chen, Hao | Characterizing the potential distribution of the invasive Asian longhorned beetle ( <i>Anoplophora glabripennis</i> ) in Worcester County, Massachusetts | Applied Geography               | 2013 | North America | USA     | Boylston, West<br>Boylston, Holden,<br>Shrewsbury,<br>Grafton, Millbury,<br>Auburn, Leicester,<br>Paxton, Sterling,<br>Clinton, Berlin,<br>Northborough (MA) | disease/ pest<br>management |
| Sherman, Alex R.; Kane, Brian; Autio, Wesley A.; Harris, J. Roger; Ryan, H. Dennis P.        | Establishment period of street trees growing in the Boston, MA metropolitan area                                                                         | Urban Forestry & Urban Greening | 2016 | North America | USA     | Boston, MA                                                                                                                                                   | establishment/ growth       |
| Shoda, Tasuku; Imanishi, Junichi; Shibata, Shozo                                             | Growth characteristics and growth equations of the diameter at breast height using tree ring measurements of street trees in Kyoto City, Japan           | Urban Forestry & Urban Greening | 2020 | Asia          | Japan   | Kyoto                                                                                                                                                        | establishment/ growth       |
| Shogren, C.; Paine, T. D.                                                                    | Economic Benefit for Cuban Laurel Thrips Biological Control                                                                                              | Journal of Economic Entomology  | 2016 | North America | USA     | Anaheim, California<br>State University,<br>Riverside, Long<br>Beach, CA                                                                                     | disease/ pest<br>management |
| Sivyer, David; Harris, J Roger; Persaud, Naraine; Appleton, Bonnie                           | EVALUATION OF A PAN EVAPORATION MODEL FOR ESTIMATING POST-PLANTING STREET TREE IRRIGATION REQUIREMENTS                                                   | Journal of Arboriculture        | 1997 | North America | USA     | Norfolk, VA                                                                                                                                                  | survival/ mortality         |
| Small, Christopher; Lu, Jacqueline W.T.                                                      | Estimation and vicarious validation of urban vegetation abundance by spectral mixture analysis                                                           | Remote Sensing of Environment   | 2006 | North America | USA     | New York City, NY                                                                                                                                            | inventory method            |
| Smitley, David R., Daniel A. Herms, and Terrance W. Davis                                    | Efficacy of Soil-Applied Neonicotinoid Insecticides for Long-Term Protection Against Emerald Ash Borer (Coleoptera: Buprestidae)                         | Forest Entomology               | 2015 | North America | USA     | Michigan and Ohio                                                                                                                                            | disease/ pest<br>management |
| Smitley, David R., E.J. Rebek, R.N. Royalty, T.W. Davis and K.F. Newhouse                    | Protection of Individual Ash Trees From Emerald Ash Borer (Coleoptera: Buprestidae) With Basal Soil Applications of Imidacloprid                         | Journal of Economic Entomology  | 2010 | North America | USA     | Westland, MI;<br>Orchard Lake, MI;<br>Ann Arbor, MI; East<br>Lansing, MI;<br>Adrian, MI                                                                      | disease/ pest<br>management |

| Author                                                                                                                                    | Title                                                                                                                                    | Journal                         | Year | Continent     | Country      | City/ State            | Theme/ Topic             |
|-------------------------------------------------------------------------------------------------------------------------------------------|------------------------------------------------------------------------------------------------------------------------------------------|---------------------------------|------|---------------|--------------|------------------------|--------------------------|
| Solfjeld, Ingjerd; Hansen, Ole Billing                                                                                                    | Post-transplant growth of five deciduous Nordic tree species as affected by transplanting date and root pruning                          | Urban Forestry & Urban Greening | 2004 | Europe        | Norway       | As                     | establishment/ growth    |
| Stoffberg, G.H.; van Rooyen, M.W.; van der Linde, M.J.; Groeneveld, H.T.                                                                  | Predicting the growth in tree height and crown size of three street tree species in the City of Tshwane, South Africa                    | Urban Forestry & Urban Greening | 2008 | Africa        | South Africa | Tshwane                | inventory method         |
| Stravinskienė, V.; Snieskienė, V.; Stankevičienė, A.                                                                                      | Health condition of <i>Tilia cordata</i> Mill. trees growing in the urban environment                                                    | Urban Forestry & Urban Greening | 2015 | Europe        | Lithuania    | Vilnius                | disease/ pest management |
| Stubbings, Philip; Peskett, Joe; Rowe, Francisco; Arribas-Bel, Dani                                                                       | A hierarchical Urban forest index using street-level imagery and deep learning                                                           | Remote Sensing                  | 2019 | Europe        | UK           | Cardiff                | inventory method         |
| Takagi, Masahiro; Gyokusen, Koichiro                                                                                                      | Light and atmospheric pollution affect photosynthesis of street trees in urban environments                                              | Urban Forestry & Urban Greening | 2004 | Asia          | Japan        | Fukuoka                | establishment/ growth    |
| Tanhuanpää, Topi; Vastaranta, Mikko; Kankare, Ville; Holopainen, Markus; Hyypä, Juha; Hyypä, Hannu; Alho, Petteri; Raisio, Juha           | Mapping of urban roadside trees – A case study in the tree register update process in Helsinki City                                      | Urban Forestry & Urban Greening | 2014 | Europe        | Finland      | Helsinki               | inventory method         |
| Timonen, Sari; Kauppinen, Pauliina                                                                                                        | Mycorrhizal colonisation patterns of <i>Tilia</i> trees in street, nursery and forest habitats in southern Finland                       | Urban Forestry & Urban Greening | 2008 | Europe        | Finland      | Koskelantie            | establishment/ growth    |
| Tirado-Corbalá, Rebecca; Slater, Brian K                                                                                                  | Soil Compaction Effects on the Establishment of Three Tropical Tree Species                                                              | Arboriculture & Urban Forestry  | 2010 | North America | USA          | Mayagüez, Puerto Rico  | establishment/ growth    |
| Tor-ngern, Pantana; Puangchit, Ladawan                                                                                                    | Effects of varying soil and atmospheric water deficit on water use characteristics of tropical street tree species                       | Urban Forestry & Urban Greening | 2018 | Asia          | Thailand     | Bangkok                | survival/ mortality      |
| Troxel, Blake; Piana, Max; Ashton, Mark S.; Murphy-Dunning, Colleen                                                                       | Relationships between bole and crown size for young urban trees in the northeastern USA                                                  | Urban Forestry & Urban Greening | 2013 | North America | USA          | New Haven, Connecticut | inventory method         |
| Trueman, Stephen J.; McMahon, Tracey V.; Grant, Elektra L.; Walton, David A.; Theilemann, Peter H.; McKinnon, Allan J.; Wallace, Helen M. | Designing food and habitat trees for urban koalas: Tree height, foliage palatability and clonal propagation of <i>Eucalyptus kabiana</i> | Urban Forestry & Urban Greening | 2017 | Oceania       | Australia    | Buderim                | establishment/ growth    |
| Tucker Lima, Joanna M.; Staudhammer, Christina L.; Brandeis, Thomas J.; Escobedo, Francisco J.; Zipperer, Wayne                           | Temporal dynamics of a subtropical urban forest in San Juan, Puerto Rico, 2001–2010                                                      | Landscape and Urban Planning    | 2013 | North America | USA          | San Juan, Puerto Rico  | survival/ mortality      |
| Vico, Giulia; Revelli, Roberto; Porporato, Amilcare                                                                                       | Ecohydrology of street trees: Design and irrigation requirements for sustainable water use                                               | Ecohydrology                    | 2014 | n/a           | n/a          | n/a                    | survival/ mortality      |

| Author                                                                                                          | Title                                                                                                                                                                                  | Journal                                                                          | Year | Continent     | Country | City/ State                                     | Theme/ Topic             |
|-----------------------------------------------------------------------------------------------------------------|----------------------------------------------------------------------------------------------------------------------------------------------------------------------------------------|----------------------------------------------------------------------------------|------|---------------|---------|-------------------------------------------------|--------------------------|
| Vogt, Jessica M.; Watkins, Shannon Lea; Mincey, Sarah K.; Patterson, Matthew S.; Fischer, Burnell C.            | Explaining planted-tree survival and growth in urban neighborhoods: A social–ecological approach to studying recently-planted trees in Indianapolis                                    | Landscape and Urban Planning                                                     | 2015 | North America | USA     | Indianapolis, IN                                | survival/ mortality      |
| von Döhren, Peer; Haase, Dagmar                                                                                 | Risk assessment concerning urban ecosystem disservices: The example of street trees in Berlin, Germany                                                                                 | Ecosystem Services                                                               | 2019 | Europe        | Germany | Berlin                                          | establishment/ growth    |
| Wang, Yuanlong; Zhao, Zhenli; Deng, Minjie; Liu, Rongning; Niu, Suyan; Fan, Guoqiang                            | Identification and Functional Analysis of MicroRNAs and Their Targets in <i>Platanus acerifolia</i> under Lead (Pb) Stress                                                             | International Journal of Molecular Sciences                                      | 2015 | n/a           | n/a     | n/a                                             | survival/ mortality      |
| Widney, Sarah; Fischer, Burnell; Vogt, Jess                                                                     | Tree Mortality Undercuts Ability of Tree-Planting Programs to Provide Benefits: Results of a Three-City Study                                                                          | Forests                                                                          | 2016 | North America | USA     | Detroit, MI; Indianapolis, IN; Philadelphia, PA | establishment/ growth    |
| Wu, Bin; Yu, Bailang; Yue, Wenhui; Shu, Song; Tan, Wenqi; Hu, Chunling; Huang, Yan; Wu, Jianping; Liu, Hongxing | A voxel-based method for automated identification and morphological parameters estimation of individual street trees from mobile laser scanning data                                   | Remote Sensing                                                                   | 2013 | n/a           | n/a     | n/a                                             | inventory method         |
| Xu, Jingzhong; Shan, Jie; Wang, Ge                                                                              | Hierarchical Modeling of Street Trees Using Mobile Laser Scanning                                                                                                                      | Remote Sensing                                                                   | 2020 | n/a           | n/a     | n/a                                             | inventory method         |
| Xu, Sheng; He, Xing-Yuan; Du, Zhong; Chen, Wei; Li, Bo; Li, Yan; Li, Mai-He; Schaub, Marcus                     | Tropospheric ozone and cadmium do not have interactive effects on growth, photosynthesis and mineral nutrients of <i>Catalpa ovata</i> seedlings in the urban areas of Northeast China | Science of the Total Environment                                                 | 2020 | Asia          | China   | Shenyang                                        | establishment/ growth    |
| Xu, Sheng; Sun, Xinyu; Yun, Jiayan; Wang, Hao                                                                   | A New Clustering-Based Framework to the Stem Estimation and Growth Fitting of Street Trees from Mobile Laser Scanning Data                                                             | IEEE Journal of Selected Topics in Applied Earth Observations and Remote Sensing | 2020 | n/a           | n/a     | n/a                                             | inventory method         |
| Xu, Sheng; Xu, Shanshan; Ye, Ning; Zhu, Fa                                                                      | Automatic extraction of street trees' nonphotosynthetic components from MLS data                                                                                                       | International Journal of Applied Earth Observation and Geoinformation            | 2018 | n/a           | n/a     | n/a                                             | inventory method         |
| Yang, Yuchao; Li, Wenbo; Tao, Jing; Zong, Shixiang                                                              | Antennal transcriptome analyses and olfactory protein identification in an important wood-boring moth pest, <i>Streltzoviella insularis</i> (Lepidoptera: Cossidae)                    | Nature Research                                                                  | 2019 | n/a           | n/a     | n/a                                             | disease/ pest management |
| Yun, H. Y.; Rossman, A. Y.; Byrne, J.                                                                           | First Report of <i>Gymnosporangium sabinae</i> , European Pear Rust, on Bradford Pear in Michigan                                                                                      | Plant Disease                                                                    | 2009 | North America | USA     | Farmington, Michigan                            | disease/ pest management |

| Author                                                                                                  | Title                                                                                                                                              | Journal                                    | Year | Continent     | Country   | City/ State                                    | Theme/ Topic               |
|---------------------------------------------------------------------------------------------------------|----------------------------------------------------------------------------------------------------------------------------------------------------|--------------------------------------------|------|---------------|-----------|------------------------------------------------|----------------------------|
| Zhang, Gui-Fen, Xiao-Hua Yan, Cheng-Fa Sheng, and Xian-Zuo Meng                                         | Mating Disruption of the Chinese Tortrix <i>Cydia Trasiata</i> (Lepidoptera: Olethreutidae) by Atmospheric Permeation with Synthetic Sex Pheromone | Environmental Entomology                   | 2001 | Asia          | China     | Beijing                                        | disease/ pest management   |
| <b>STREET TREE FUNCTION</b>                                                                             |                                                                                                                                                    |                                            |      |               |           |                                                |                            |
| <i>Supporting Ecosystem Services</i>                                                                    |                                                                                                                                                    |                                            |      |               |           |                                                |                            |
| Alvarez, Ivan André; Gallo, Bruna Cristina; Garçon, Edlene Aparecida Monteiro; Oshiro, Osvaldo Tadamoto | Street Tree Inventory of Campinas, Brazil: An Instrument for Urban Forestry Management and Planning                                                | Arboriculture & Urban Forestry             | 2015 | South America | Brazil    | Campinas                                       | biodiversity assessments   |
| Ball, John; Mason, Sarah; Kiesz, Aaron; McCormick, Dan; Brown, Craig                                    | Assessing the Hazard of Emerald Ash Borer and Other Exotic Stressors to Community Forests                                                          | Arboriculture & Urban Forestry             | 2007 | North America | USA       | South Dakota                                   | biodiversity assessments   |
| Cobley, L.A.E.; Pataki, D.E.                                                                            | Vehicle emissions and fertilizer impact the leaf chemistry of urban trees in Salt Lake Valley, UT                                                  | Environmental Pollution                    | 2019 | North America | USA       | Salt Lake City, UT                             | nitrogen and carbon cycles |
| Cowett, F D; Bassuk, Nina                                                                               | Statewide assessment of street trees in New York State, USA                                                                                        | Urban Forestry & Urban Greening            | 2014 | North America | USA       | New York, New York                             | biodiversity assessments   |
| Cowett, F D; Bassuk, Nina                                                                               | Street Tree Diversity in Three Northeastern U.S. States                                                                                            | Arboriculture & Urban Forestry             | 2017 | North America | USA       | New Jersey, New York, Pennsylvania             | biodiversity assessments   |
| Cowett, F D; Bassuk, Nina                                                                               | Street Tree Diversity in Massachusetts, U.S.A.                                                                                                     | Arboriculture & Urban Forestry             | 2020 | North America | USA       | Massachusetts                                  | biodiversity assessments   |
| Frank, Stephen; Waters, Glenn; Beer, Russell; May, Peter                                                | An Analysis of the Street Tree Population of Greater Melbourne at the Beginning of the 21st Century                                                | Arboriculture & Urban Forestry             | 2006 | Oceania       | Australia | Melbourne                                      | biodiversity assessments   |
| Galvin, Michael F.                                                                                      | A methodology for assessing and managing biodiversity in street tree populations                                                                   | Journal of Arboriculture                   | 1999 | North America | USA       | Mount Rainier, Maryland                        | biodiversity assessments   |
| Kadir, Mohd Akmal Abd; Othman, Noriah                                                                   | Towards a Better Tomorrow: Street Trees and Their Values in Urban Areas                                                                            | Procedia - Social and Behavioral Sciences  | 2012 | Asia          | Malaysia  | Klang, Selangor                                | biodiversity assessments   |
| Kane, Brian; Warren, Paige S.; Lerman, Susannah B.                                                      | A broad scale analysis of tree risk, mitigation and potential habitat for cavity-nesting birds                                                     | Urban Forestry & Urban Greening            | 2015 | North America | USA       | Baltimore, MD, n=10 towns in Western Mass., MA | habitat formation          |
| Kara, Baris                                                                                             | Assessment of the Distribution and Diversity of Street Tree Species in Aydin, Turkey                                                               | Journal of Food, Agriculture & Environment | 2012 | Asia          | Turkey    | Aydin                                          | biodiversity assessments   |
| Kendal, Dave; Dobbs, Cynamon; Lohr, Virginia I.                                                         | Global patterns of diversity in the urban forest: Is there evidence to support the 10/20/30 rule?                                                  | Urban Forestry & Urban Greening            | 2014 | Global        | Global    | 108 cities around the world                    | biodiversity assessments   |

| Author                                                                                                                          | Title                                                                                                                                  | Journal                         | Year | Continent             | Country                    | City/ State                             | Theme/ Topic             |
|---------------------------------------------------------------------------------------------------------------------------------|----------------------------------------------------------------------------------------------------------------------------------------|---------------------------------|------|-----------------------|----------------------------|-----------------------------------------|--------------------------|
| Kuruner-Chitepo, Chiyedza; Shackleton, Charlie M.                                                                               | The distribution, abundance and composition of street trees in selected towns of the Eastern Cape, South Africa                        | Urban Forestry & Urban Greening | 2011 | Africa                | South Africa               | Port Alfred, Grahamstown, Somerset East | biodiversity assessments |
| Matsuba, Misako; Nishijima, Shota; Katoh, Kazuhiro                                                                              | Effectiveness of corridor vegetation depends on urbanization tolerance of forest birds in central Tokyo, Japan                         | Urban Forestry & Urban Greening | 2016 | Asia                  | Japan                      | Tokyo                                   | habitat formation        |
| McBride, Joe R.; Douhovnikoff, Vladimir                                                                                         | Characteristics of the urban forests in arctic and near-arctic cities                                                                  | Urban Forestry & Urban Greening | 2012 | Europe, North America | Russia, Greenland, Iceland | Murmansk, Nuuk, Reykjavik               | biodiversity assessments |
| McPherson, E. Gregory; van Doorn, Natalie; de Goede, John                                                                       | Structure, function and value of street trees in California, USA                                                                       | Urban Forestry & Urban Greening | 2016 | North America         | USA                        | Multiple sites in CA                    | biodiversity assessments |
| Nagendra, Harini; Gopal, Divya                                                                                                  | Street trees in Bangalore: Density, diversity, composition and distribution                                                            | Urban Forestry & Urban Greening | 2010 | Asia                  | India                      | Bangalore                               | biodiversity assessments |
| Pearce, Lilian M; Kirkpatrick, James B; Davison, Aidan                                                                          | Using Size Class Distributions of Species to Deduce the Dynamics of the Private Urban Forest                                           | Arboriculture & Urban Forestry  | 2013 | Oceania               | Australia                  | Melbourne; Hobart                       | biodiversity assessments |
| Pena, João Carlos de Castro; Martello, Felipe; Ribeiro, Milton Cezar; Armitage, Richard A.; Young, Robert J.; Rodrigues, Marcos | Street trees reduce the negative effects of urbanization on birds                                                                      | PloS One                        | 2017 | South America         | Brazil                     | Minas Gerais                            | habitat formation        |
| Plant, Lyndal; Sipe, Neil                                                                                                       | Adapting and applying evidence gathering techniques for planning and investment in street trees: A case study from Brisbane, Australia | Urban Forestry & Urban Greening | 2016 | Oceania               | Australia                  | Brisbane                                | biodiversity assessments |
| Potter, Daniel, Heath Bartosh, Gerald Dangel, Judy Yang, Roxanne Bittman, and John Preece                                       | Clarifying the Conservation Status of Northern California Black Walnut ( <i>Juglans hindsii</i> ) Using Microsatellite Markers         | Madroño                         | 2018 | North America         | USA                        | California and Oregon                   | biodiversity assessments |



| Author                                                     | Title                                                                                                                                   | Journal                                        | Year | Continent     | Country      | City/ State                                                                                                                                                                                                                                                    | Theme/ Topic             |
|------------------------------------------------------------|-----------------------------------------------------------------------------------------------------------------------------------------|------------------------------------------------|------|---------------|--------------|----------------------------------------------------------------------------------------------------------------------------------------------------------------------------------------------------------------------------------------------------------------|--------------------------|
| Raupp, Michael J; Cumming, Anne Buckelew; Raupp, Erin C    | Street Tree Diversity in Eastern North America and Its Potential for Tree Loss to Exotic Borers                                         | Arboriculture & Urban Forestry                 | 2006 | North America | USA          | Wilmington, Delaware; Chicago, Illinois; Lincolnshire, Illinois; Marion, Indiana; Florence, Kentucky; Mt. Rainier, Maryland; Ann Arbor, Michigan; Kansas City, Missouri; New York City, New York; Gastonia, North Carolina; Toledo, Ohio; and Toronto, Ontario | biodiversity assessments |
| Ressler, Daniel E. and John A. Kilmer                      | Street Tree Inventory of Selinsgrove, Pennsylvania                                                                                      | Journal of the Pennsylvania Academy of Science | 2012 | North America | USA          | Selinsgrove, Pennsylvania                                                                                                                                                                                                                                      | biodiversity assessments |
| Riley, Christopher B.; Herms, Daniel A.; Gardiner, Mary M. | Exotic trees contribute to urban forest diversity and ecosystem services in inner-city Cleveland, OH                                    | Urban Forestry & Urban Greening                | 2018 | North America | USA          | Cleveland, Ohio                                                                                                                                                                                                                                                | biodiversity assessments |
| Roman, Lara A., John J. Battles, and Joe R. McBride        | The balance of planting and mortality in a street tree population                                                                       | Urban Ecosystems                               | 2013 | North America | USA          | West Oakland, California                                                                                                                                                                                                                                       | biodiversity assessments |
| Shackleton, Charlie                                        | Do indigenous street trees promote more biodiversity than alien ones? Evidence using mistletoes and birds in South Africa               | Forests                                        | 2016 | Africa        | South Africa | Currie Park, Hill 60, Kingswood, Oatlands, Oatlands North, Somerset Heights, Sunnyside, West Hill                                                                                                                                                              | habitat formation        |
| Shams, Zafar Iqbal                                         | Changes in diversity and composition of flora along a corridor of different land uses in Karachi over 20 years: Causes and implications | Urban Forestry & Urban Greening                | 2016 | Asia          | Pakistan     | Karachi                                                                                                                                                                                                                                                        | biodiversity assessments |

| Author                                                                                                      | Title                                                                                                                                                        | Journal                         | Year | Continent             | Country                                            | City/ State                                                                                                                   | Theme/ Topic             |
|-------------------------------------------------------------------------------------------------------------|--------------------------------------------------------------------------------------------------------------------------------------------------------------|---------------------------------|------|-----------------------|----------------------------------------------------|-------------------------------------------------------------------------------------------------------------------------------|--------------------------|
| Sjöman, Henrik; Östberg, Johan; Bühler, Oliver                                                              | Diversity and distribution of the urban tree population in ten major Nordic cities                                                                           | Urban Forestry & Urban Greening | 2012 | Europe                | Denmark, Finland, Sweden, Norway                   | Aarhus, Copenhagen (Denmark), Espoo, Helsinki, Tampere, Turku (Finland), Gothenburg, Malmo, Stockholm (Sweden), Oslo (Norway) | biodiversity assessments |
| Sreetheran, M; Adnan, M; Azuar, A K Khairil                                                                 | Street Tree Inventory and Tree Risk Assessment of Selected Major Roads in Kuala Lumpur, Malaysia                                                             | Arboriculture & Urban Forestry  | 2011 | Asia                  | Malaysia                                           | Kuala Lumpur                                                                                                                  | biodiversity assessments |
| Stewart, G.H.; Meurk, C.D.; Ignatieva, M.E.; Buckley, H.L.; Magueur, A.; Case, B.S.; Hudson, M.; Parker, M. | URban Biotopes of Aotearoa New Zealand (URBANZ) II: Floristics, biodiversity and conservation values of urban residential and public woodlands, Christchurch | Urban Forestry & Urban Greening | 2009 | Oceania               | New Zealand                                        | Christchurch                                                                                                                  | biodiversity assessments |
| Stewart, Glenn H.; Ignatieva, Maria E.; Meurk, Colin D.; Earl, Richard D.                                   | The re-emergence of indigenous forest in an urban environment, Christchurch, New Zealand                                                                     | Urban Forestry & Urban Greening | 2004 | Oceania               | New Zealand                                        | Christchurch                                                                                                                  | biodiversity assessments |
| Strohbach, Michael W.; Lerman, Susannah B.; Warren, Paige S.                                                | Are small greening areas enhancing bird diversity? Insights from community-driven greening projects in Boston                                                | Landscape and Urban Planning    | 2013 | North America         | USA                                                | Boston, MA                                                                                                                    | habitat formation        |
| Subburayalu, S.; Sydnor, T.D.                                                                               | Assessing street tree diversity in four Ohio communities using the weighted Simpson index                                                                    | Landscape and Urban Planning    | 2012 | North America         | USA                                                | Toledo, OH; Westerville, OH; Dublin, OH; Yellow Springs, OH                                                                   | biodiversity assessments |
| Thaiutsa, Bunvong; Puangchit, Ladawan; Kjølsgren, Roger; Arunpraparut, Wanchai                              | Urban green space, street tree and heritage large tree assessment in Bangkok, Thailand                                                                       | Urban Forestry & Urban Greening | 2008 | Asia                  | Thailand                                           | Bangkok                                                                                                                       | biodiversity assessments |
| Thomsen, Pernille; Bühler, Oliver; Kristoffersen, Palle                                                     | Diversity of street tree populations in larger Danish municipalities                                                                                         | Urban Forestry & Urban Greening | 2016 | Europe                | Denmark                                            | n=30 cities and towns                                                                                                         | biodiversity assessments |
| van Doorn, Natalie S.; McPherson, E. Gregory                                                                | Demographic trends in Claremont California's street tree population                                                                                          | Urban Forestry & Urban Greening | 2018 | North America         | USA                                                | Claremont, California                                                                                                         | biodiversity assessments |
| Wittig, Rüdiger; Becker, Ute                                                                                | The spontaneous flora around street trees in cities—A striking example for the worldwide homogenization of the flora of urban habitats                       | Flora                           | 2010 | Europe. North America | USA, UK, France, Germany, Poland, Austria, Denmark | Baltimore, Maryland; London, Paris, Hamburg, Copenhagen, Berlin, Vienna and Warsaw                                            | biodiversity assessments |

| Author                                                                                                                                               | Title                                                                                                                                         | Journal                                                                     | Year | Continent     | Country   | City/ State                                                                           | Theme/ Topic             |
|------------------------------------------------------------------------------------------------------------------------------------------------------|-----------------------------------------------------------------------------------------------------------------------------------------------|-----------------------------------------------------------------------------|------|---------------|-----------|---------------------------------------------------------------------------------------|--------------------------|
| Wood, Eric M.; Esaian, Sevan                                                                                                                         | The importance of street trees to urban avifauna                                                                                              | Ecological Applications: A Publication of the Ecological Society of America | 2020 | North America | USA       | Los Angeles, California                                                               | habitat formation        |
| Yang, Jun; Zhou, Jinxing; Ke, Yuzhou; Xiao, Jianmin                                                                                                  | Assessing the structure and stability of street trees in Lhasa, China                                                                         | Urban Forestry & Urban Greening                                             | 2012 | Asia          | China     | Lhasa                                                                                 | biodiversity assessments |
| Young, Karen M., Christoper B. Daniels, and Greg Johnston                                                                                            | Species of Street Tree is Important for Southern Hemisphere Bird Trophic Guilds                                                               | Austral Ecology                                                             | 2007 | Oceania       | Australia | Adelaide                                                                              | habitat formation        |
| Youngsteadt, Elsa; Ernst, Andrew F.; Dunn, Robert R.; Frank, Steven D.                                                                               | Responses of arthropod populations to warming depend on latitude: evidence from urban heat islands                                            | Global Change Biology                                                       | 2017 | North America | USA       | Raleigh, North Carolina; Baltimore, Maryland; Queens, New York; Boston, Massachusetts | habitat formation        |
| Zhang, Dongxu, Kuo Sun, QiuHong Xiang, Xinrui Wang, JiuHeng Xu, Qing Wang and Wenbin Guan                                                            | The complete chloroplast genome sequence of Aesculus Chinensis Bunge, a major street tree                                                     | Mitochondrial DNA part B                                                    | 2019 | n/a           | n/a       | n/a                                                                                   | biodiversity assessments |
| Zhou, Bo; Liu, Jinmei; Liang, Wei                                                                                                                    | Breeding in a noisy world: Attraction to urban arterial roads and preference for nest-sites by the scaly-breasted munia (Lonchura punctulata) | Global Ecology and Conservation                                             | 2020 | Asia          | China     | Changjiang County                                                                     | habitat formation        |
| <b>STREET TREE FUNCTION</b>                                                                                                                          |                                                                                                                                               |                                                                             |      |               |           |                                                                                       |                          |
| <i>Regulating Ecosystem Services</i>                                                                                                                 |                                                                                                                                               |                                                                             |      |               |           |                                                                                       |                          |
| Aguiar, Axton C.; French, Kris; Chisholm, Laurie A.                                                                                                  | A comparison of the ameliorating effects of native and exotic street trees on surface heat retention at dusk                                  | Urban Climate                                                               | 2014 | Oceania       | Australia | Wollongong                                                                            | cooling                  |
| Aminipouri, Mehdi; Knudby, Anders Jensen; Krayenhoff, E. Scott; Zickfeld, Kirsten; Middel, Ariane                                                    | Modelling the impact of increased street tree cover on mean radiant temperature across Vancouver's local climate zones                        | Urban Forestry & Urban Greening                                             | 2019 | North America | Canada    | Vancouver, British Columbia                                                           | cooling                  |
| Aminipouri, Mehdi; Rayner, David; Lindberg, Fredrik; Thorsson, Sofia; Knudby, Anders Jensen; Zickfeld, Kirsten; Middel, Ariane; Krayenhoff, E. Scott | Urban tree planting to maintain outdoor thermal comfort under climate change: The case of Vancouver's local climate zones                     | Building and Environment                                                    | 2019 | North America | Canada    | Vancouver, British Columbia                                                           | cooling                  |
| Armson, David; Rahman, Mohammad Asrafur; Ennos, Anthony Roland                                                                                       | A Comparison of the Shading Effectiveness of Five Different Street Tree Species in Manchester, UK                                             | Arboriculture & Urban Forestry                                              | 2013 | Europe        | UK        | Manchester                                                                            | cooling                  |
| Berardi, Umberto; Graham, Jonathan                                                                                                                   | Investigation of the impacts of microclimate on PV energy efficiency and outdoor thermal comfort                                              | Sustainable Cities and Society                                              | 2020 | North America | Canada    | Brampton, Ontario                                                                     | cooling                  |

| Author                                                                                                                                                             | Title                                                                                                                                          | Journal                                  | Year | Continent     | Country   | City/ State        | Theme/ Topic          |
|--------------------------------------------------------------------------------------------------------------------------------------------------------------------|------------------------------------------------------------------------------------------------------------------------------------------------|------------------------------------------|------|---------------|-----------|--------------------|-----------------------|
| Berger, C.; Rosentreter, J.; Voltersen, M.; Baumgart, C.; Schmullius, C.; Hese, S.                                                                                 | Spatio-temporal analysis of the relationship between 2D/3D urban site characteristics and land surface temperature                             | Remote Sensing of Environment            | 2017 | Europe        | Germany   | Berlin; Cologne    | cooling               |
| Berland, Adam; Hopton, Matthew E.                                                                                                                                  | Comparing street tree assemblages and associated stormwater benefits among communities in metropolitan Cincinnati, Ohio, USA                   | Urban Forestry & Urban Greening          | 2014 | North America | USA       | Cincinnati, OH     | stormwater management |
| Blanus, Tijana; Fantozzi, Federica; Monaci, Fabrizio; Bargagli, Roberto                                                                                            | Leaf trapping and retention of particles by holm oak and other common tree species in Mediterranean urban environments                         | Urban Forestry & Urban Greening          | 2015 | Europe        | UK        | Reading            | air quality           |
| Boukili, Vanessa K.S.; Bebb, Daniel P.; Mortimer, Tegan; Venix, Gitta; Lefcourt, David; Chandler, Mark; Eisenberg, Cristina                                        | Assessing the performance of urban forest carbon sequestration models using direct measurements of tree growth                                 | Urban Forestry & Urban Greening          | 2017 | North America | USA       | Cambridge, MA      | carbon sequestration  |
| Cariñanos, Paloma; Ruiz-Peñuela, Soledad; Valle, Ana M.; de la Guardia, Consuelo Díaz                                                                              | Assessing pollination disservices of urban street-trees: The case of London-plane tree ( <i>Platanus x hispanica</i> Mill. ex Münchh)          | Science of the Total Environment         | 2020 | Europe        | Spain     | Granada            | air quality           |
| Chaparro, Marcos A.E.; Chaparro, Mauro A.E.; Castañeda-Miranda, Ana G.; Marié, Débora C.; Gargiulo, José D.; Lavornia, Juan M.; Natal, Marcela; Böhnelt, Harald N. | Fine air pollution particles trapped by street tree barks: In situ magnetic biomonitoring                                                      | Environmental Pollution                  | 2020 | South America | Argentina | Buenos Aires       | air quality           |
| Chen, Ying-Chu                                                                                                                                                     | Evaluation of greenhouse gas emissions and energy recovery from planting street trees                                                          | Greenhouse Gases: Science and Technology | 2020 | Asia          | Taiwan    | Keelung            | carbon sequestration  |
| Denman, E.C.; May, P.B.; Moore, G.M.                                                                                                                               | The potential role of urban forests in removing nutrients from stormwater                                                                      | Journal of Environmental Quality         | 2016 | Oceania       | Australia |                    | stormwater management |
| Elliott, Robert M.; Adkins, Elizabeth R.; Culligan, Patricia J.; Palmer, Matthew I.                                                                                | Stormwater infiltration capacity of street tree pits: Quantifying the influence of different design and management strategies in New York City | Ecological Engineering                   | 2018 | North America | USA       | New York, New York | stormwater management |
| Frosi, Marcelo Henrique; Kargar, Maryam; Jutras, Pierre; Prasher, Shiv O.; Clark, O. Grant                                                                         | Street Tree Pits as Bioretention Units: Effects of Soil Organic Matter and Area Permeability on the Volume and Quality of Urban Runoff         | Water, Air, and Soil Pollution           | 2019 | North America | Canada    | Montreal, Quebec   | stormwater management |
| Gillner, Sten; Vogt, Julianne; Tharang, Andreas; Dettmann, Sebastian; Roloff, Andreas                                                                              | Role of street trees in mitigating effects of heat and drought at highly sealed urban sites                                                    | Landscape and Urban Planning             | 2015 | Europe        | Germany   | Dresden            | cooling               |

| Author                                                                                                                                           | Title                                                                                                                                             | Journal                              | Year | Continent     | Country     | City/ State | Theme/ Topic          |
|--------------------------------------------------------------------------------------------------------------------------------------------------|---------------------------------------------------------------------------------------------------------------------------------------------------|--------------------------------------|------|---------------|-------------|-------------|-----------------------|
| Gong, Fang-Ying; Zeng, Zhao-Cheng; Zhang, Fan; Li, Xiaojiang; Ng, Edward; Norford, Leslie K.                                                     | Mapping sky, tree, and building view factors of street canyons in a high-density urban environment                                                | Building and Environment             | 2018 | Asia          | China       | Hong Kong   | cooling               |
| Gonzalez-Sosa, Enrique; Braud, Isabelle; Becerril Piña, Rocio; Mastachi Loza, Carlos Alberto; Ramos Salinas, Norma Maricela; Chavez, Cesar Veliz | A methodology to quantify ecohydrological services of street trees                                                                                | Ecohydrology & Hydrobiology          | 2017 | North America | Mexico      | Quere'taro  | stormwater management |
| Grey, Vaughn; Livesley, Stephen J.; Fletcher, Tim D.; Szota, Christopher                                                                         | Tree pits to help mitigate runoff in dense urban areas                                                                                            | Journal of Hydrology                 | 2018 | Oceania       | Australia   | Melbourne   | stormwater management |
| Grey, Vaughn; Livesley, Stephen J.; Fletcher, Tim D.; Szota, Christopher                                                                         | Establishing street trees in stormwater control measures can double tree growth when extended waterlogging is avoided                             | Landscape and Urban Planning         | 2018 | Oceania       | Australia   | Melbourne   | stormwater management |
| Hall, Justine M.; Handley, John F.; Ennos, A. Roland                                                                                             | The potential of tree planting to climate-proof high density residential areas in Manchester, UK                                                  | Landscape and Urban Planning         | 2012 | Europe        | UK          | Manchester  | cooling               |
| Jin, Sijia; Guo, Jiankang; Wheeler, Stephen; Kan, Liyan; Che, Shengquan                                                                          | Evaluation of impacts of trees on PM2.5 dispersion in urban streets                                                                               | Atmospheric Environment              | 2014 | Asia          | China       | Shanghai    | air quality           |
| Johansson, Erik; Spangenberg, Jörg; Gouvêa, Mariana Lino; Freitas, Edmilson D.                                                                   | Scale-integrated atmospheric simulations to assess thermal comfort in different urban tissues in the warm humid summer of São Paulo, Brazil       | Urban Climate                        | 2013 | South America | Brazil      | Sao Paulo   | cooling               |
| Kántor, Noémi; Chen, Liang; Gál, Csilla V.                                                                                                       | Human-biometeorological significance of shading in urban public spaces—Summertime measurements in Pécs, Hungary                                   | Landscape and Urban Planning         | 2018 | Europe        | Hungary     | Pécs        | cooling               |
| Karttunen, Sasu; Kurppa, Mona; Auvinen, Mikko; Hellsten, Antti; Jarvi, Leena                                                                     | Large-eddy simulation of the optimal street-tree layout for pedestrian-level aerosol particle concentrations - A case study from a city-boulevard | Atmospheric Environment              | 2020 | Europe        | Finland     | Helsinki    | air quality           |
| Kim, Suyeon; Lee, Sangwoo; Hwang, Kwangil; An, Kyungjin                                                                                          | Exploring Sustainable Street Tree Planting Patterns to Be Resistant against Fine Particles (PM2.5)                                                | Sustainability                       | 2017 | Asia          | South Korea | Seoul       | air quality           |
| Klemm, Wiebke; Heusinkveld, Bert G.; Lenzholzer, Sanda; van Hove, Bert                                                                           | Street greenery and its physical and psychological impact on thermal comfort                                                                      | Landscape and Urban Planning         | 2015 | Europe        | Netherlands | Utrecht     | cooling               |
| Konarska, Janina; Holmer, Bjorn; Lindberg, Fredrik; Thorsson, Sofia                                                                              | Influence of vegetation and building geometry on the spatial variations of air temperature and cooling rates in a high-latitude city              | International Journal of Climatology | 2016 | Europe        | Sweden      | Gothenburg  | cooling               |

| Author                                                                                                                                                                                                  | Title                                                                                                                                               | Journal                                            | Year | Continent             | Country | City/ State                  | Theme/ Topic |
|---------------------------------------------------------------------------------------------------------------------------------------------------------------------------------------------------------|-----------------------------------------------------------------------------------------------------------------------------------------------------|----------------------------------------------------|------|-----------------------|---------|------------------------------|--------------|
| Krayenhoff, E. Scott; Jiang, Timothy; Christen, Andreas; Martilli, Alberto; Oke, Timothy R.; Bailey, Brian N.; Nazarian, Negin; Voogt, James A.; Giometto, Marco G.; Stastny, Austine; Crawford, Ben R. | A multi-layer urban canopy meteorological model with trees (BEP-Tree): Street tree impacts on pedestrian-level climate                              | Urban Climate                                      | 2020 | Europe, North America | USA, UK | Salt Lake City, Utah, London | cooling      |
| Kroeger, Timm; McDonald, Robert I.; Boucher, Timothy; Zhang, Ping; Wang, Longzhu                                                                                                                        | Where the people are: Current trends and future potential targeted investments in urban trees for PM10 and temperature mitigation in 27 U.S. Cities | Landscape and Urban Planning                       | 2018 | North America         | USA     | n=27 cities                  | air quality  |
| Lai, Yuan; Kontokosta, Constantine E.                                                                                                                                                                   | The impact of urban street tree species on air quality and respiratory illness: A spatial analysis of large-scale, high-resolution urban data       | Health & Place                                     | 2019 | North America         | USA     | New York, New York           | air quality  |
| Li, Guanghao; Ren, Zhihui; Zhan, Changhong                                                                                                                                                              | Sky View Factor-based correlation of landscape morphology and the thermal environment of street canyons: A case study of Harbin, China              | Building and Environment                           | 2020 | Asia                  | China   | Harbin                       | cooling      |
| Li, Xiaojiang; Ratti, Carlo; Seiferling, Ian                                                                                                                                                            | Quantifying the shade provision of street trees in urban landscape: A case study in Boston, USA, using Google Street View                           | Landscape and Urban Planning                       | 2018 | North America         | USA     | Boston, Massachusetts        | cooling      |
| Lovasi, G. S.; Quinn, J. W.; Neckerman, K. M.; Perzanowski, M. S.; Rundle, A.                                                                                                                           | Children living in areas with more street trees have lower prevalence of asthma                                                                     | Journal of Epidemiology and Community Health       | 2008 | North America         | USA     | New York City, NY            | air quality  |
| Mackey, Christopher W.; Lee, Xuhui; Smith, Ronald B.                                                                                                                                                    | Remotely sensing the cooling effects of city scale efforts to reduce urban heat island                                                              | Building and Environment                           | 2012 | North America         | USA     | Chicago, Illinois            | cooling      |
| Maimaitiyiming, Matthew; Ghulam, Abduwasit; Tiyp, Tashpolat; Pla, Filiberto; Latorre-Carmona, Pedro; Halik, Ümüt; Sawut, Mamat; Caetano, Mario                                                          | Effects of green space spatial pattern on land surface temperature: Implications for sustainable urban planning and climate change adaptation       | ISPRS Journal of Photogrammetry and Remote Sensing | 2014 | Asia                  | China   | Aksu City                    | cooling      |
| Marando, Federica; Salvatori, Elisabetta; Sebastiani, Alessandro; Fusaro, Lina; Manes, Fausto                                                                                                           | Regulating Ecosystem Services and Green Infrastructure: assessment of Urban Heat Island effect mitigation in the municipality of Rome, Italy        | Ecological Modelling                               | 2019 | Europe                | Italy   | Rome                         | cooling      |
| Maya Manzano, José María; Tormo Molina, Rafael; Fernández Rodríguez, Santiago; Silva Palacios, Inmaculada; Gonzalo Garijo, Ángela                                                                       | Distribution of ornamental urban trees and their influence on airborne pollen in the SW of Iberian Peninsula                                        | Landscape and Urban Planning                       | 2017 | Europe                | Spain   | Don Benito, Plasencia, Zafra | air quality  |

| Author                                                                                                                            | Title                                                                                                                                                     | Journal                                      | Year | Continent     | Country     | City/ State               | Theme/ Topic          |
|-----------------------------------------------------------------------------------------------------------------------------------|-----------------------------------------------------------------------------------------------------------------------------------------------------------|----------------------------------------------|------|---------------|-------------|---------------------------|-----------------------|
| McPherson, E Gregory; Muchnick, Jules                                                                                             | EFFECTS OF STREET TREE SHADE ON ASPHALT CONCRETE PAVEMENT PERFORMANCE                                                                                     | Journal of Arboriculture                     | 2005 | North America | USA         | Modesto. CA               | cooling               |
| Morakinyo, Tobi Eniolu; Lam, Yun Fat                                                                                              | Simulation study on the impact of tree-configuration, planting pattern and wind condition on street-canyon's micro-climate and thermal comfort            | Building and Environment                     | 2016 | n/a           | n/a         | n/a                       | cooling               |
| Olajire, Abass A. and Edward O. Olanipekun                                                                                        | Total and Leachable Phosphorus in Urban Street Tree Leaves                                                                                                | Bulletin of the Chemical Society of Ethiopia | 2000 | Africa        | Nigeria     | Ogbomoso                  | stormwater management |
| Ortolani, Chiara; Vitale, Marcello                                                                                                | The importance of local scale for assessing, monitoring and predicting of air quality in urban areas                                                      | Sustainable Cities and Society               | 2016 | Europe        | Italy       | Rome                      | air quality           |
| Page, Jonathan L.; Winston, Ryan J.; Hunt III, William F.                                                                         | Soils beneath suspended pavements: An opportunity for stormwater control and treatment                                                                    | Ecological Engineering                       | 2015 | North America | USA         | Wilmington, NC            | stormwater management |
| Page, Jonathan L.; Winston, Ryan J.; Mayes, Dave B.; Perrin, Christy A.; Hunt, William F.                                         | Retrofitting residential streets with stormwater control measures over sandy soils for water quality improvement at the catchment scale                   | Journal of Environmental Engineering         | 2015 | North America | USA         | Wilmington, NC            | stormwater management |
| Paoletti, Elena                                                                                                                   | Ozone and urban forests in Italy                                                                                                                          | Environmental Pollution                      | 2009 | Europe        | Italy       | Milan, Florence, and Bari | air quality           |
| Park, Chae Yeon; Lee, Dong Kun; Krayenhoff, E. Scott; Heo, Han Kyul; Ahn, Saekyul; Asawa, Takashi; Murakami, Akinobu; Kim, Ho Gul | A multilayer mean radiant temperature model for pedestrians in a street canyon with trees                                                                 | Building and Environment                     | 2018 | n/a           | n/a         | n/a                       | cooling               |
| Park, Chae Yeon; Lee, Dong Kun; Krayenhoff, E. Scott; Heo, Han Kyul; Hyun, Jung Hee; Oh, Kyushik; Park, Tae Yoon                  | Variations in pedestrian mean radiant temperature based on the spacing and size of street trees                                                           | Sustainable Cities and Society               | 2019 | n/a           | n/a         | n/a                       | cooling               |
| Park, Jonghoon; Kim, Jun-Hyun; Lee, Dong Kun; Park, Chae Yeon; Jeong, Seung Gyu                                                   | The influence of small green space type and structure at the street level on urban heat island mitigation                                                 | Urban Forestry & Urban Greening              | 2017 | Asia          | South Korea | Seoul                     | cooling               |
| Park, Minsun; Hagishima, Aya; Tanimoto, Jun; Narita, Ken-ichi                                                                     | Effect of urban vegetation on outdoor thermal environment: Field measurement at a scale model site                                                        | Building and Environment                     | 2012 | Asia          | Japan       | Saitama Prefecture        | cooling               |
| Qiu, Guo Yu; Yu, Xiaohui; Wen, Haiyan; Yan, Chunhua                                                                               | An advanced approach for measuring the transpiration rate of individual urban trees by the 3D three-temperature model and thermal infrared remote sensing | Journal of Hydrology                         | 2020 | Asia          | China       | Shenzhen                  | cooling               |

| Author                                                                                                                        | Title                                                                                                                                                  | Journal                              | Year | Continent     | Country                                   | City/ State           | Theme/ Topic          |
|-------------------------------------------------------------------------------------------------------------------------------|--------------------------------------------------------------------------------------------------------------------------------------------------------|--------------------------------------|------|---------------|-------------------------------------------|-----------------------|-----------------------|
| Rahman, M A; Stringer, P; Ennos, A R                                                                                          | Effect of Pit Design and Soil Composition on Performance of Pyrus calleryana Street Trees in the Establishment Period                                  | Arboriculture & Urban Forestry       | 2013 | Europe        | UK                                        | Manchester            | cooling               |
| Rahman, Mohammad A.; Moser, Astrid; Anderson, Marshal; Zhang, Chi; Rötzer, Thomas; Pauleit, Stephan                           | Comparing the infiltration potentials of soils beneath the canopies of two contrasting urban tree species                                              | Urban Forestry & Urban Greening      | 2019 | Europe        | Germany                                   | Munich                | stormwater management |
| Rahman, Mohammad A.; Moser, Astrid; Gold, Anna; Rotzer, Thomas; Pauleit, Stephan                                              | Vertical air temperature gradients under the shade of two contrasting urban tree species during different types of summer days                         | Science of the Total Environment     | 2018 | Europe        | Germany                                   | Munich                | cooling               |
| Rahman, Mohammad A.; Moser, Astrid; Rötzer, Thomas; Pauleit, Stephan                                                          | Microclimatic differences and their influence on transpirational cooling of Tilia cordata in two contrasting street canyons in Munich, Germany         | Agricultural and Forest Meteorology  | 2017 | Europe        | Germany                                   | Munich                | cooling               |
| Razzaghamanesh, Mostafa; Beecham, Simon; Salemi, Telma                                                                        | The role of green roofs in mitigating Urban Heat Island effects in the metropolitan area of Adelaide, South Australia                                  | Urban Forestry & Urban Greening      | 2016 | Oceania       | Australia                                 | Adelaide              | cooling               |
| Richards, Daniel R.; Edwards, Peter J.                                                                                        | Quantifying street tree regulating ecosystem services using Google Street View                                                                         | Ecological Indicators                | 2017 | Asia          | Singapore                                 | n/a                   | cooling               |
| Richter, Scarlet; Haase, Dagmar; Thestorff, Kolja; Makki, Mohsen                                                              | Carbon Pools of Berlin, Germany: Organic Carbon in Soils and Aboveground in Trees                                                                      | Urban Forestry & Urban Greening      | 2020 | Europe        | Germany                                   | Berlin                | carbon sequestration  |
| Riikonen, Anu, Leena Järvi, and Eero Nikinmaa                                                                                 | Environmental and Crown Related Factors Affecting Street Tree Transpiration in Helsinki, Finland                                                       | Urban Ecosystems                     | 2016 | Europe        | Finland                                   | Helsinki              | stormwater management |
| Riikonen, Anu; Pumpanen, Jukka; Mäki, Mari; Nikinmaa, Eero                                                                    | High carbon losses from established growing sites delay the carbon sequestration benefits of street tree plantings – A case study in Helsinki, Finland | Urban Forestry & Urban Greening      | 2017 | Europe        | Finland                                   | Helsinki              | carbon sequestration  |
| Roseen, Robert M.; Ballesterio, Thomas P.; Houle, James J.; Avellaneda, Pedro; Briggs, Joshua; Fowler, George; Wildey, Robert | Seasonal performance variations for storm-water management systems in cold climate conditions                                                          | Journal of Environmental Engineering | 2009 | North America | USA                                       | Durham, New Hampshire | stormwater management |
| Saaroni, H.; Amorim, J.H.; Hiemstra, J.A.; Pearlmutter, D.                                                                    | Urban Green Infrastructure as a tool for urban heat mitigation: Survey of research methodologies and findings across different climatic regions        | Urban Climate                        | 2018 | Asia, Europe  | Sweden, the Netherlands, Portugal, Israel | n/a                   | cooling               |



| Author                                                                                                                | Title                                                                                                                                            | Journal                              | Year | Continent     | Country      | City/ State             | Theme/ Topic          |
|-----------------------------------------------------------------------------------------------------------------------|--------------------------------------------------------------------------------------------------------------------------------------------------|--------------------------------------|------|---------------|--------------|-------------------------|-----------------------|
| Sadeghi, K. Majid; Kharaghani, Shahram; Tam, Wing; Gaerlan, Natalia; Loaiciga, Hugo                                   | Green Stormwater Infrastructure (GSI) for Stormwater Management in the City of Los Angeles: Avalon Green Alleys Network                          | Environmental Processes              | 2019 | North America | USA          | Los Angeles, California | stormwater management |
| Sanusi, Ruzana; Johnstone, Denise; May, Peter; Livesley, Stephen J.                                                   | Street orientation and side of the street greatly influence the microclimatic benefits street trees can provide in summer                        | Journal of Environmental Quality     | 2016 | Oceania       | Australia    | Melbourne               | cooling               |
| Sanusi, Ruzana; Johnstone, Denise; May, Peter; Livesley, Stephen J.                                                   | Microclimate benefits that different street tree species provide to sidewalk pedestrians relate to differences in Plant Area Index               | Landscape and Urban Planning         | 2017 | Oceania       | Australia    | Melbourne               | cooling               |
| Shashua-Bar, Limor; Hoffman, Milo E.                                                                                  | Geometry and orientation aspects in passive cooling of canyon streets with trees                                                                 | Energy and Buildings                 | 2003 | Asia          | Israel       | Tel Aviv                | cooling               |
| Shashua-Bar, Limor; Hoffman, Milo E.                                                                                  | Quantitative evaluation of passive cooling of the UCL microclimate in hot regions in summer, case study: urban streets and courtyards with trees | Building and Environment             | 2004 | Asia          | Israel       | Tel Aviv                | cooling               |
| Shashua-Bar, Limor; Potchter, Oded; Bitan, Arie; Boltansky, Dalia; Yaakov, Yaron                                      | Microclimate modelling of street tree species effects within the varied urban morphology in the Mediterranean city of Tel Aviv, Israel           | International Journal of Climatology | 2010 | Asia          | Israel       | Tel Aviv                | cooling               |
| Skelhorn, Cynthia P.; Levermore, Geoff; Lindley, Sarah J.                                                             | Impacts on cooling energy consumption due to the UHI and vegetation changes in Manchester, UK                                                    | Energy and Buildings                 | 2016 | Europe        | UK           | Manchester              | cooling               |
| Smith, Ian A.; Dearborn, Victoria K.; Hutyra, Lucy R.                                                                 | Live fast, die young: Accelerated growth, mortality, and turnover in street trees                                                                | PloS One                             | 2019 | North America | USA          | Boston, Petersham, MA   | carbon sequestration  |
| Srivanit, Manat; Jareemit, Daranee                                                                                    | Modeling the influences of layouts of residential townhouses and tree-planting patterns on outdoor thermal comfort in Bangkok suburb             | Journal of Building Engineering      | 2020 | Asia          | Thailand     | Bangkok                 | cooling               |
| Stoffberg, G.H.; van Rooyen, M.W.; van der Linde, M.J.; Groeneveld, H.T.                                              | Carbon sequestration estimates of indigenous street trees in the City of Tshwane, South Africa                                                   | Urban Forestry & Urban Greening      | 2010 | Africa        | South Africa | Tshwane                 | carbon sequestration  |
| Szota, Christopher; Coutts, Andrew M.; Thom, Jasmine K.; Virahsawmy, Harry K.; Fletcher, Tim D.; Livesley, Stephen J. | Street tree stormwater control measures can reduce runoff but may not benefit established trees                                                  | Landscape and Urban Planning         | 2019 | Oceania       | Australia    | Melbourne               | stormwater management |
| Takebayashi, Hideki; Kimura, Yutaro; Kyogoku, Sae                                                                     | Study on the appropriate selection of urban heat island measure technologies to urban block properties                                           | Sustainable Cities and Society       | 2014 | n/a           | n/a          | n/a                     | cooling               |

| Author                                                                                                                                     | Title                                                                                                                                        | Journal                          | Year | Continent     | Country   | City/ State           | Theme/ Topic          |
|--------------------------------------------------------------------------------------------------------------------------------------------|----------------------------------------------------------------------------------------------------------------------------------------------|----------------------------------|------|---------------|-----------|-----------------------|-----------------------|
| Tallis, Matthew; Taylor, Gail; Sinnett, Danielle; Freer-Smith, Peter                                                                       | Estimating the removal of atmospheric particulate pollution by the urban tree canopy of London, under current and future environments        | Landscape and Urban Planning     | 2011 | Europe        | UK        | London                | air quality           |
| Tanhuanpää, Topi; Kankare, Ville; Setälä, Heikki; Yli-Pelkonen, Vesa; Vastaranta, Mikko; Niemi, Mikko T.; Raisio, Juha; Holopainen, Markus | Assessing above-ground biomass of open-grown urban trees: A comparison between existing models and a volume-based approach                   | Urban Forestry & Urban Greening  | 2017 | Europe        | Finland   | Helsinki              | carbon sequestration  |
| Teshirogi, Jun; Ishida, Yasuyuki; Mochida, Akashi                                                                                          | Study on long-term measurement of transpiration from multiple urban vegetation for grasping latent heat consumption under various conditions | Urban Climate                    | 2020 | Asia          | Japan     | Sodegaura             | cooling               |
| Thom, Jasmine K.; Coutts, Andrew M.; Broadbent, Ashley M.; Tapper, Nigel J.                                                                | The influence of increasing tree cover on mean radiant temperature across a mixed development suburb in Adelaide, Australia                  | Urban Forestry & Urban Greening  | 2016 | Oceania       | Australia | Adelaide              | cooling               |
| Trlica, Andrew; Hutyra, Lucy R.; Morreale, Luca L.; Smith, Ian A.; Reinmann, Andrew B.                                                     | Current and future biomass carbon uptake in Boston's urban forest                                                                            | Science of the Total Environment | 2020 | North America | USA       | Boston, Massachusetts | carbon sequestration  |
| Vailshery, Lionel Sujay; Jaganmohan, Madhumitha; Nagendra, Harini                                                                          | Effect of street trees on microclimate and air pollution in a tropical city                                                                  | Urban Forestry & Urban Greening  | 2013 | Asia          | India     | Bangalore             | air quality, cooling  |
| Wang, Chenghao; Li, Qi; Wang, Zhi-Hua                                                                                                      | Quantifying the impact of urban trees on passive pollutant dispersion using a coupled large-eddy simulation–Lagrangian stochastic model      | Building and Environment         | 2018 | n/a           | n/a       | n/a                   | air quality           |
| Wang, Xiaoshuang; Teng, Mingjun; Huang, Chunbo; Zhou, Zhixiang; Chen, Xiaoping; Xiang, Yang                                                | Canopy density effects on particulate matter attenuation coefficients in street canyons during summer in the Wuhan metropolitan area         | Atmospheric Environment          | 2020 | Asia          | China     | Wuhan                 | air quality           |
| Wang, Yi; Thompson, Anita M.; Selbig, William R.                                                                                           | Leachable phosphorus from senesced green ash and Norway maple leaves in urban watersheds                                                     | Science of the Total Environment | 2020 | North America | USA       | Madison, WI           | stormwater management |
| Wang, Yupeng and Hashem Akbari                                                                                                             | The effects of street tree planting on Urban Heat Island mitigation in Montreal                                                              | Sustainable Cities and Society   | 2016 | North America | Canada    | Montreal              | cooling               |
| Wang, Yupeng; Akbari, Hashem                                                                                                               | The effects of street tree planting on Urban Heat Island mitigation in Montreal                                                              | Sustainable Cities and Society   | 2016 | North America | Canada    | Montreal, Quebec      | cooling               |
| Wang, Zhi-Hua                                                                                                                              | Monte Carlo simulations of radiative heat exchange in a street canyon with trees                                                             | Solar Energy                     | 2014 | n/a           | n/a       | n/a                   | cooling               |

| Author                                                                                                                                                                                                                                                                                               | Title                                                                                                                            | Journal                                                                                                                                 | Year | Continent     | Country     | City/ State          | Theme/ Topic         |
|------------------------------------------------------------------------------------------------------------------------------------------------------------------------------------------------------------------------------------------------------------------------------------------------------|----------------------------------------------------------------------------------------------------------------------------------|-----------------------------------------------------------------------------------------------------------------------------------------|------|---------------|-------------|----------------------|----------------------|
| Wang, Zhi-Hua; Zhao, Xiaoxi; Yang, Jiachuan; Song, Jiyun                                                                                                                                                                                                                                             | Cooling and energy saving potentials of shade trees and urban lawns in a desert city                                             | Applied Energy                                                                                                                          | 2016 | North America | USA         | Phoenix, Arizona     | cooling              |
| Weichenthal, Scott; Van Ryswyk, Keith; Goldstein, Alon; Shekarrizfard, Maryam; Hatzopoulou, Marianne                                                                                                                                                                                                 | Characterizing the spatial distribution of ambient ultrafine particles in Toronto, Canada: A land use regression model           | Environmental Pollution                                                                                                                 | 2016 | North America | Canada      | Toronto, Ontario     | air quality          |
| White, M.; Kimm, G.; Langenheim, N.                                                                                                                                                                                                                                                                  | Pedestrian Access Modelling with Tree Shade – Won't Someone Think of the Children                                                | Procedia Engineering                                                                                                                    | 2017 | Oceania       | Australia   | n/a                  | cooling              |
| Yang, Hongyu; Chen, Taihan; Lin, Yuanyuan; Buccolieri, Riccardo; Mattsson, Magnus; Zhang, Ming; Hang, Jian; Wang, Qun                                                                                                                                                                                | Integrated impacts of tree planting and street aspect ratios on CO dispersion and personal exposure in full-scale street canyons | Building and Environment                                                                                                                | 2020 | n/a           | n/a         | n/a                  | air quality          |
| Yang, Yujun; Zhou, Dian; Gao, Weijun; Zhang, Zihan; Chen, Wei; Peng, Wangchongyu                                                                                                                                                                                                                     | Simulation on the impacts of the street tree pattern on built summer thermal comfort in cold region of China                     | Sustainable Cities and Society                                                                                                          | 2018 | Asia          | China       | Xi'an                | cooling              |
| Yeager, Ray; Riggs, Daniel W.; DeJarnett, Natasha; Srivastava, Shweta; Lorkiewicz, Pawel; Xie, Zhengzhi; Krivokhizhina, Tatiana; Keith, Rachel J.; Srivastava, Sanjay; Browning, Matthew H.E.M.; Zafar, Nagma; Krishnasamy, Sathya; DeFilippis, Andrew; Turner, Jay; Rai, Shesh N.; Bhatnagar, Aruni | Association between residential greenness and exposure to volatile organic compounds                                             | Science of the Total Environment                                                                                                        | 2020 | North America | USA         | Louisville, Kentucky | air quality          |
| Yoon, Tae Kyung, Chan-Woo Park, Sun Jeoung Lee, Suin Ko, Kyung Nam Kim, Yeongmo Son, Kyung Hak Lee, Suhyun Oh, Woo-Kyun Lee, and Yowhan Son                                                                                                                                                          | Allometric Equations for Estimating the Aboveground Volume of Five Common Urban Street Tree Species in Daegu, Korea              | Urban Forestry & Urban Greening                                                                                                         | 2013 | Asia          | South Korea | Daegu                | carbon sequestration |
| Zhao, Xiaolong; Li, Guojie; Gao, Tianyu                                                                                                                                                                                                                                                              | Research on Optimization and Biological Characteristics of Harbin Trees Based on Thermal Comfort in Summer                       | International High-Performance Built Environment Conference – A Sustainable Built Environment Conference 2016 Series (SBE16), iHBE 2016 | 2017 | Asia          | China       | Heilongjiang         | cooling              |

| Author                                                                                                  | Title                                                                                                                                                                            | Journal                                                                                                     | Year | Continent     | Country      | City/ State                      | Theme/ Topic      |
|---------------------------------------------------------------------------------------------------------|----------------------------------------------------------------------------------------------------------------------------------------------------------------------------------|-------------------------------------------------------------------------------------------------------------|------|---------------|--------------|----------------------------------|-------------------|
| Zheng, Bohong; Bernard BEDRA, Komi; Zheng, Jian; Wang, Guoguang                                         | Combination of Tree Configuration with Street Configuration for Thermal Comfort Optimization under Extreme Summer Conditions in the Urban Center of Shantou City, China          | Sustainability                                                                                              | 2018 | Asia          | China        | Guangdong                        | cooling           |
| Zhong, Jian; Nikolova, Irina; Cai, Xiaoming; MacKenzie, A. Rob; Harrison, Roy M.                        | Modelling traffic-induced multicomponent ultrafine particles in urban street canyon compartments: Factors that inhibit mixing                                                    | Environmental Pollution                                                                                     | 2018 | n/a           | n/a          | n/a                              | air quality       |
| Zielonko-Jung, Katarzyna and Justyna Janiak                                                             | Trees as a Shading System for Streets on the East–West Axis: Computer Simulations for the Selected Geometrical Proportions of Building Developments in Humid Continental Climate | Sustainability                                                                                              | 2019 | n/a           | n/a          | n/a                              | cooling           |
| Zong, Hua; Yao, Manqing; Tang, Yuqian; Chen, Han                                                        | Assessing the composition, diversity, and allergenic risk of street trees in Qingyang District of Chengdu City                                                                   | Urban Forestry & Urban Greening                                                                             | 2020 | Asia          | China        | Qingyang District, Chengdu City. | air quality       |
| <b>STREET TREE FUNCTION</b>                                                                             |                                                                                                                                                                                  |                                                                                                             |      |               |              |                                  |                   |
| <i>Provisioning Ecosystem Services</i>                                                                  |                                                                                                                                                                                  |                                                                                                             |      |               |              |                                  |                   |
| Čukanović, Jelena; Tešević, Vele; Jadranin, Milka; Ljubojević, Mirjana; Mladenović, Emina; Kostić, Saša | Horse chestnut ( <i>Aesculus hippocastanum</i> L.) seed fatty acids, flavonoids and heavy metals plasticity to different urban environments                                      | Biochemical Systematics and Ecology                                                                         | 2020 | Asia          | Serbia       | Vojvodina Province               | edible food/fruit |
| Grohmann, D.; Petrucci, R.; Torre, L.; Micheli, M.; Menconi, M.E.                                       | Street trees' management perspectives: Reuse of <i>Tilia</i> sp.'s pruning waste for insulation purposes                                                                         | Urban Forestry & Urban Greening                                                                             | 2019 | Europe        | Italy        | Perugia                          | pruning waste     |
| Hurley, Patrick T.; Emery, Marla R.                                                                     | Locating provisioning ecosystem services in urban forests: Forageable woody species in New York City, USA                                                                        | Landscape and Urban Planning                                                                                | 2018 | North America | USA          | New York, New York               | edible food/fruit |
| Moodley, Roshila; Koorbanally, Neil; Jonnalagadda, Sreekanth B.                                         | Elemental composition and nutritional value of the edible fruits of <i>Harpephyllum caffrum</i> and impact of soil quality on their chemical characteristics                     | Journal of Environmental Science and Health - Part B Pesticides, Food Contaminants, and Agricultural Wastes | 2013 | Africa        | South Africa | Umhlanga                         | edible food/fruit |
| <b>STREET TREE FUNCTION</b>                                                                             |                                                                                                                                                                                  |                                                                                                             |      |               |              |                                  |                   |
| <i>Cultural Ecosystem Services</i>                                                                      |                                                                                                                                                                                  |                                                                                                             |      |               |              |                                  |                   |
| Abass, Zainab Ibrahim; Tucker, Richard                                                                  | Neighborhood Determinants of Quality of Life                                                                                                                                     | Journal of Happiness Studies                                                                                | 2018 | Oceania       | Australia    | Belmont, Grovedale, Waurn Ponds  | social contact    |

| Author                                                                              | Title                                                                                                                                                 | Journal                                                           | Year | Continent     | Country  | City/ State                 | Theme/ Topic      |
|-------------------------------------------------------------------------------------|-------------------------------------------------------------------------------------------------------------------------------------------------------|-------------------------------------------------------------------|------|---------------|----------|-----------------------------|-------------------|
| Asgarzadeh, Morteza; Lusk, Anne; Koga, Takaaki; Hirate, Kotaroh                     | Street trees as cultural elements in the city: Understanding how perception affects ecosystem services management in Porto, Portugal                  | Urban Forestry & Urban Greening                                   | 2012 | Asia          | Japan    | Tokyo                       | whole body health |
| Bjornstrom, Eileen E. S.; Ralston, Margaret L.                                      | Stress Recovery of Campus Street Trees as Visual Stimuli on Graduate Students in Autumn                                                               | International Journal of Environmental Research and Public Health | 2014 | North America | USA      | Los Angeles, CA             | social contact    |
| Bolund, Per; Hunhammar, Sven                                                        | Urban Streetscape Design and Crash Severity                                                                                                           | Transportation Research Record                                    | 1999 | Europe        | Sweden   | Stockholm                   | co-benefits       |
| Burley, Blair Alexandra                                                             | Effects of skeletal streetscape design on perceived safety                                                                                            | Landscape and Urban Planning                                      | 2018 | North America | USA      | Portland, OR                | safety            |
| Chudyk, Anna M.; Winters, Meghan; Gorman, Erin; McKay, Heather A.; Ashe, Maureen C. | The missing middle filling the gap between walkability and observed walking behavior                                                                  | Transportation Research Record                                    | 2014 | North America | Canada   | Vancouver, British Columbia | physical activity |
| Cusack, Leanne; Larkin, Andrew; Carozza, Susan E.; Hystad, Perry                    | Linking green space to neighborhood social capital in older adults: The role of perceived safety                                                      | Social Science & Medicine                                         | 2017 | North America | USA      | Portland, Oregon            | whole body health |
| Ferrer, Sheila; Ruiz, Tomás; Mars, Lidón                                            | Landmark selection in the environment: Relationships with object characteristics and sense of direction                                               | Spatial Cognition and Computation                                 | 2015 | Europe        | Spain    | Valencia                    | physical activity |
| Gandelman, Néstor; Piani, Giorgina; Ferre, Zuleika                                  | A dose-response curve describing the relationship between urban tree cover density and self-reported stress recovery                                  | Environment and Behavior                                          | 2012 | South America | Uruguay  | n/a                         | whole body health |
| Graça, Marisa; Queirós, Cristina; Farinha-Marques, Paulo; Cunha, Mario              | Green Streets: Urban Green and Birth Outcomes                                                                                                         | International Journal of Environmental Research and Public Health | 2018 | Europe        | Portugal | Porto                       | co-benefits       |
| Guo, Li-Na; Zhao, Ren-Lin; Ren, Ai-Hua; Niu, Li-Xin; Zhang, Yan-Long                | The transportation safety of elderly pedestrians: Modeling contributing factors to elderly pedestrian collisions                                      | Accident Analysis and Prevention                                  | 2019 | Asia          | China    | Xianyang                    | whole body health |
| Harvey, Chester; Aultman-Hall, Lisa                                                 | Right tree, right place, right time: A visual-functional design approach to select and place trees for optimal shade benefit to commuting pedestrians | Sustainable Cities and Society                                    | 2015 | North America | USA      | New York City, NY           | safety            |
| Harvey, Chester; Aultman-Hall, Lisa; Hurley, Stephanie E.; Troy, Austin             | Does awareness effect the restorative function and perception of street trees?                                                                        | Frontiers in Psychology                                           | 2015 | North America | USA      | New York City, NY           | safety            |
| Herrmann, Thomas; Boisjoly, Genevieve; Ross, Nancy A.; El-Geneidy, Ahmed M.         | Effects of urban street vegetation on judgments of restoration likelihood                                                                             | Urban Forestry & Urban Greening                                   | 2017 | North America | Canada   | Montreal, Quebec            | physical activity |

| Author                                                                                                                          | Title                                                                                                                           | Journal                                                           | Year | Continent     | Country   | City/ State                                                            | Theme/ Topic      |
|---------------------------------------------------------------------------------------------------------------------------------|---------------------------------------------------------------------------------------------------------------------------------|-------------------------------------------------------------------|------|---------------|-----------|------------------------------------------------------------------------|-------------------|
| Hong, Andy; Sallis, James F.; King, Abby C.; Conway, Terry L.; Saelens, Brian; Cain, Kelli L.; Fox, Eric H.; Frank, Lawrence D. | Did community greening reduce crime? Evidence from New Haven, CT, 19962007                                                      | Landscape and Urban Planning                                      | 2018 | North America | USA       | Seattle/King County, WA, Baltimore, MD, Washington, DC                 | social contact    |
| Ishikawa, Toru; Nakamura, Uiko                                                                                                  | Body Mass Index, Safety Hazards, and Neighborhood Attractiveness                                                                | American Journal of Preventive Medicine                           | 2012 | Asia          | Japan     | Tokyo                                                                  | safety            |
| Jiang, Bin; Li, Dongying; Larsen, Linda; Sullivan, William C.                                                                   | Aesthetic Amenities and Safety Hazards Associated with Walking and Bicycling for Transportation in New York City                | Annals of Behavioral Medicine                                     | 2014 | North America | USA       | Champaign-Urbana, IL, Springfield, IL, Indianapolis, IN, St. Louis, MO | whole body health |
| Kathryn Abelt; Sara McLafferty                                                                                                  | Neighborhood safety and green space as predictors of obesity among preschool children from low-income families in New York City | Preventive Medicine                                               | 2017 | North America | USA       | New York City, NY                                                      | whole body health |
| Kim, Dohyung                                                                                                                    | Urban clear zones, street trees, and road safety                                                                                | Research in Transportation Business & Management                  | 2019 | North America | USA       | Los Angeles, CA                                                        | safety            |
| Langenheim, Nano; White, Marcus; Tapper, Nigel; Livesley, Stephen J.; Ramirez-Lovering, Diego                                   | Window view to the sky as a restorative resource for residents in densely populated cities                                      | Environment and Behavior                                          | 2020 | Oceania       | Australia | Melbourne                                                              | co-benefits       |
| Lin, Ying-Hsuan; Tsai, Chih-Chang; Sullivan, William C.; Chang, Po-Ju; Chang, Chun-Yen                                          | The good things in urban nature: A thematic framework for optimising urban planning for nature connectedness                    | Landscape and Urban Planning                                      | 2014 | Asia          | Taiwan    | Taipei                                                                 | whole body health |
| Lindal, Pall J.; Hartig, Terry                                                                                                  | Green Spaces, Land Cover, Street Trees and Hypertension in the Megacity of São Paulo                                            | International Journal of Environmental Research and Public Health | 2015 | Europe        | Iceland   | n/a                                                                    | whole body health |
| Locke, Dexter H.; Han, SeungHoon; Kondo, Michelle C.; Murphy-Dunning, Colleen; Cox, Mary                                        | The street tree effect and driver safety                                                                                        | ITE Journal (Institute of Transportation Engineers)               | 2017 | North America | USA       | New Haven, CT                                                          | safety            |
| Lovasi, Gina S.; Bader, Michael D.M.; Quinn, James; Neckerman, Kathryn; Weiss, Christopher; Rundle, Andrew                      | The influence of green streets on cycling behavior in European cities                                                           | Landscape and Urban Planning                                      | 2012 | North America | USA       | New York City, NY                                                      | physical activity |
| Lovasi, Gina S.; Schwartz-Soicher, Ofira; Neckerman, Kathryn M.; Konty, Kevin; Kerker, Bonnie; Quinn, James; Rundle, Andrew     | Disparities in Urban Neighborhood Conditions: Evidence from GIS Measures and Field Observation in New York City                 | Journal of Public Health Policy                                   | 2013 | North America | USA       | New York City, NY                                                      | physical activity |

| Author                                                                                                                                                    | Title                                                                                                                    | Journal                                                                 | Year | Continent     | Country   | City/ State                 | Theme/ Topic      |
|-----------------------------------------------------------------------------------------------------------------------------------------------------------|--------------------------------------------------------------------------------------------------------------------------|-------------------------------------------------------------------------|------|---------------|-----------|-----------------------------|-------------------|
| Lovasi, Gina S.; Schwartz-Soicher, Ofira; Quinn, James W.; Berger, Diana K.; Neckerman, Kathryn M.; Jaslow, Risa; Lee, Karen K.; Rundle, Andrew           | Is All Urban Green Space the Same? A Comparison of the Health Benefits of Trees and Grass in New York City               | International Journal of Environmental Research and Public Health       | 2013 | North America | USA       | New York City, NY           | physical activity |
| Marshall P.E., Wesley E.; Coppola, Nicholas; Golombek, Yanev                                                                                              | Anomalies in Australian municipal tree managers' street-tree planting and species selection principles                   | Urban Forestry & Urban Greening                                         | 2018 | North America | USA       | Denver, CO                  | safety            |
| Masoudinejad, Sepideh; Hartig, Terry                                                                                                                      | Exposure to natural space, sense of community belonging, and adverse mental health outcomes across an urban region       | Environmental Research                                                  | 2020 | Asia          | Iran      | Tehran                      | whole body health |
| McEwan, Kirsten; Ferguson, Fiona J.; Richardson, Miles; Cameron, Ross                                                                                     | Co-benefits of designing communities for active living: An exploration of literature                                     | The International Journal of Behavioral Nutrition and Physical Activity | 2020 | Europe        | UK        | Sheffield                   | whole body health |
| Moreira, Tiana C. L.; Polizel, Jefferson L.; Santos, Itamar de Souza; Silva Filho, Demóstenes F.; Bensenor, Isabela; Lotufo, Paulo A.; Mauad, Thais       | Health and climate related ecosystem services provided by street trees in the urban environment                          | Environmental Health: A Global Access Science Source                    | 2020 | South America | Brazil    | Sao Paulo                   | whole body health |
| Naderi, Jody Rosenblatt; Kweon, Byoung Suk; Maghelal, Praveen                                                                                             | Exploring associations between urban green, street design and walking: Results from the Greater London boroughs          | Landscape and Urban Planning                                            | 2008 | North America | USA       | NA                          | safety            |
| Nawrath, Maximilian; Kowarik, Ingo; Fischer, Leonie K.                                                                                                    | How important is green infrastructure in small and medium-sized towns? Lessons from South Africa                         | Landscape and Urban Planning                                            | 2019 | Europe        | Germany   | Berlin                      | physical activity |
| Neckerman, Kathryn M; Lovasi, Gina S; Davies, Stephen; Purciel, Marnie; Quinn, James; Feder, Eric; Raghunath, Nakita; Wasserman, Benjamin; Rundle, Andrew | Effects of street parks on social interactions among neighbors: A place perspective                                      | Journal of Architectural and Planning Research                          | 2009 | North America | USA       | New York, New York          | physical activity |
| Reid, Colleen; Clougherty, Jane; Shmool, Jessie; Kubzansky, Laura                                                                                         | Walkability and Pedestrian Perceptions in Malang City Emerging Business Corridor                                         | Procedia Environmental Sciences                                         | 2017 | North America | USA       | New York City, NY           | whole body health |
| Roy, Sudipto                                                                                                                                              | Urban residential environments and senior citizens' longevity in megacity areas: The importance of walkable green spaces | Journal of Epidemiology and Community Health                            | 2017 | Oceania       | Australia | n=129 cities and towns      | co-benefits       |
| Rugel, Emily J.; Carpiano, Richard M.; Henderson, Sarah B.; Brauer, Michael                                                                               | Research note: Urban street tree density and antidepressant prescription rates-A cross-sectional study in London, UK     | Landscape and Urban Planning                                            | 2019 | North America | Canada    | Vancouver, British Columbia | whole body health |

| Author                                                                                                                                                                                                                        | Title                                                                                                                    | Journal                                      | Year | Continent | Country      | City/ State                                                                                                                                          | Theme/ Topic      |
|-------------------------------------------------------------------------------------------------------------------------------------------------------------------------------------------------------------------------------|--------------------------------------------------------------------------------------------------------------------------|----------------------------------------------|------|-----------|--------------|------------------------------------------------------------------------------------------------------------------------------------------------------|-------------------|
| Sallis, James F.; Spoon, Chad; Cavill, Nick; Engelberg, Jessa K.; Gebel, Klaus; Parker, Mike; Thornton, Christina M.; Lou, Debbie; Wilson, Amanda L.; Cutter, Carmen L.; Ding, Ding                                           | Exploring the Relationship Between Trees and Human Stress in the Urban Environment                                       | Arboriculture & Urban Forestry               | 2015 | n/a       | n/a          | n/a                                                                                                                                                  | co-benefits       |
| Salmund, Jennifer A.; Tadaki, Marc; Vardoulakis, Sotiris; Arbuthnott, Katherine; Coutts, Andrew; Demuzere, Matthias; Dirks, Kim N.; Heaviside, Clare; Lim, Shanon; Macintyre, Helen; McInnes, Rachel N.; Wheeler, Benedict W. | Associations between types of greenery along neighborhood roads and weight status in different climates                  | Urban Forestry & Urban Greening              | 2016 | n/a       | n/a          | n/a                                                                                                                                                  | co-benefits       |
| Sarkar, Chinmoy; Webster, Chris; Pryor, Matthew; Tang, Dorothy; Melbourne, Scott; Zhang, Xiaohu; Jianzheng, Liu                                                                                                               | Street-level neighborhood greenery linked to active transportation: A case study in Milwaukee and Green Bay, WI, USA     | Landscape and Urban Planning                 | 2015 | Europe    | UK           | London                                                                                                                                               | physical activity |
| Shackleton, C.M.; Blair, A.; De Lacy, P.; Kaoma, H.; Mugwagwa, N.; Dalu, M.T.; Walton, W.                                                                                                                                     | Green streetscape and walking: Exploring active mobility patterns in dense and compact cities                            | Journal of Transport & Health                | 2018 | Africa    | South Africa | Bathurst, Bela-Bela, Bloemfontein, Fort Beaufort, Grahamstown, King William's Town, Phalabrowa, Port Alfred, Queenstown, Tzaneen, Worcester, Zeerust | co-benefits       |
| Skjoeveland, Oddvar                                                                                                                                                                                                           | Residential greenness, air pollution and psychological well-being among urban residents in Guangzhou, China              | Science of the Total Environment             | 2001 | Europe    | Norway       | Bergen                                                                                                                                               | social contact    |
| Sutikno, Fauzul Rizal; Surjono; Kurniawan, Eddi Basuki                                                                                                                                                                        | Does collaborative tree planting between nonprofits and neighborhood groups improve neighborhood community capacity?     | Cities                                       | 2013 | Asia      | Indonesia    | Malang City                                                                                                                                          | physical activity |
| Takano, T.; Nakamura, K.; Watanabe, M.                                                                                                                                                                                        | Urban residential environments and senior citizens' longevity in megacity areas: The importance of walkable green spaces | Journal of Epidemiology and Community Health | 2002 | Asia      | Japan        | Tokyo                                                                                                                                                | physical activity |



| Author                                                                                                                                                                               | Title                                                                                                                | Journal                             | Year | Continent     | Country | City/ State                                                                            | Theme/ Topic        |
|--------------------------------------------------------------------------------------------------------------------------------------------------------------------------------------|----------------------------------------------------------------------------------------------------------------------|-------------------------------------|------|---------------|---------|----------------------------------------------------------------------------------------|---------------------|
| Taylor, Mark S.; Wheeler, Benedict W.; White, Mathew P.; Economou, Theodoros; Osborne, Nicholas J.                                                                                   | Research note: Urban street tree density and antidepressant prescription rates-A cross-sectional study in London, UK | Landscape and Urban Planning        | 2015 | Europe        | UK      | London                                                                                 | whole body health   |
| Townsend, Joseph B; Ilvento, Thomas W; Barton, Susan S                                                                                                                               | Exploring the Relationship Between Trees and Human Stress in the Urban Environment                                   | Arboriculture & Urban Forestry      | 2016 | North America | USA     | Wilmington, Delaware                                                                   | whole body health   |
| Tsai, Wei-Lun; Davis, Amy J.S.; Jackson, Laura E.                                                                                                                                    | Associations between types of greenery along neighborhood roads and weight status in different climates              | Urban Forestry & Urban Greening     | 2019 | North America | USA     | Portland Oregon; Austin, Texas                                                         | physical activity   |
| Tsai, Wei-Lun; Yngve, Leah; Zhou, Yuhong; Beyer, Kirsten M.M.; Bersch, Andrew; Malecki, Kristen M.; Jackson, Laura E.                                                                | Street-level neighborhood greenery linked to active transportation: A case study in Milwaukee and Green Bay, WI, USA | Landscape and Urban Planning        | 2019 | North America | USA     | Milwaukee and Green Bay, Wisconsin                                                     | physical activity   |
| Vich, Guillem; Marquet, Oriol; Miralles-Guasch, Carme                                                                                                                                | Green streetscape and walking: Exploring active mobility patterns in dense and compact cities                        | Journal of Transport & Health       | 2019 | Europe        | Spain   | Barcelona                                                                              | physical activity   |
| Wang, Ruoyu; Yang, Boyi; Yao, Yao; Bloom, Michael S.; Feng, Zhiqiang; Yuan, Yuan; Zhang, Jinbao; Liu, Penghua; Wu, Wenjie; Lu, Yi; Baranyi, Gergő; Wu, Rong; Liu, Ye; Dong, Guanghui | Residential greenness, air pollution and psychological well-being among urban residents in Guangzhou, China          | Science of the Total Environment    | 2020 | Asia          | China   | Guangzhou                                                                              | whole body health   |
| Watkins, Shannon Lea; Vogt, Jess; Mincey, Sarah K.; Fischer, Burnell C.; Bergmann, Rachael A.; Widney, Sarah E.; Westphal, Lynne M.; Sweeney, Sean                                   | Does collaborative tree planting between nonprofits and neighborhood groups improve neighborhood community capacity? | Cities                              | 2018 | North America | USA     | Detroit, Michigan; Philadelphia, Pennsylvania; Indianapolis, Indiana; Atlanta, Georgia | social contact      |
| <b>STREET TREE VALUE</b>                                                                                                                                                             |                                                                                                                      |                                     |      |               |         |                                                                                        |                     |
| <i>Economic Value</i>                                                                                                                                                                |                                                                                                                      |                                     |      |               |         |                                                                                        |                     |
| Donovan, Geoffrey H.; Butry, David T.                                                                                                                                                | Trees in the city: Valuing street trees in Portland, Oregon                                                          | Landscape and Urban Planning        | 2010 | North America | USA     | Portland, Oregon                                                                       | economic evaluation |
| Donovan, Geoffrey H.; Butry, David T.                                                                                                                                                | The effect of urban trees on the rental price of single-family homes in Portland, Oregon                             | Urban Forestry & Urban Greening     | 2011 | North America | USA     | Portland, Oregon                                                                       | economic evaluation |
| Escobedo, Francisco J.; Wagner, John E.; Nowak, David J.; De la Maza, Carmen Luz; Rodriguez, Manuel; Crane, Daniel E.                                                                | Analyzing the cost effectiveness of Santiago, Chile's policy of using urban forests to improve air quality           | Journal of Environmental Management | 2008 | South America | Chile   | Santiago                                                                               | economic evaluation |

| Author                                                                                                                                                  | Title                                                                                                                                             | Journal                         | Year | Continent     | Country | City/ State                            | Theme/ Topic           |
|---------------------------------------------------------------------------------------------------------------------------------------------------------|---------------------------------------------------------------------------------------------------------------------------------------------------|---------------------------------|------|---------------|---------|----------------------------------------|------------------------|
| Fruth, Erik; Kvistad, Michele; Marshall, Joe; Pfeifer, Lena; Rau, Luisa; Sagebiel, Julian; Soto, Daniel; Tarpey, John; Weir, Jessica; Winiarski, Bradyn | Economic valuation of street-level urban greening: A case study from an evolving mixed-use area in Berlin                                         | Land Use Policy                 | 2019 | Europe        | Germany | Berlin                                 | economic evaluation    |
| Kovacs, Kent F.; Haight, Robert G.; Jung, Suhyun; Locke, Dexter H.; O'Neil-Dunne, Jarlath                                                               | The marginal cost of carbon abatement from planting street trees in New York City                                                                 | Ecological Economics            | 2013 | North America | USA     | New York, New York                     | economic evaluation    |
| Li, Xiaoshu; Holmes, Thomas P.; Boyle, Kevin J.; Crocker, Ellen V.; Nelson, C. Dana                                                                     | Hedonic analysis of forest pest invasion: The case of emerald ash borer                                                                           | Forests                         | 2019 | North America | USA     | Milwaukee, Wisconsin                   | economic evaluation    |
| Maco, S E                                                                                                                                               | A practical approach to assessing structure, function, and value of street tree populations in small communities                                  | Journal of Arboriculture        | 2003 | North America | USA     | Davis, California                      | economic evaluation    |
| Marissa Matsler, A.                                                                                                                                     | Making 'green' fit in a 'grey' accounting system: The institutional knowledge system challenges of valuing urban nature as infrastructural assets | Environmental Science & Policy  | 2019 | North America | USA     | Portland, Oregon                       | finance administration |
| McCabe, James J                                                                                                                                         | A SUMMARY AND FORECAST OF DEMAND FOR MUNICIPAL STREET TREE SERVICE ON STATEN ISLAND, NEW YORK                                                     | Urban Forestry & Urban Greening | 2001 | North America | USA     | Staten Island, New York                | finance administration |
| McCabe, James J                                                                                                                                         | A DISCRETE EVENT SIMULATION OF A MUNICIPAL STREET TREE MAINTENANCE OPERATION                                                                      | Journal of Arboriculture        | 2002 | North America | USA     | Staten Island, New York                | finance administration |
| McPherson, E Gregory                                                                                                                                    | A BENEFIT-COST ANALYSIS OF TEN STREET TREE SPECIES IN MODESTO, CALIFORNIA, U.S.                                                                   | Journal of Arboriculture        | 2003 | North America | USA     | Modesto, California                    | economic evaluation    |
| Mell, Ian C.; Henneberry, John; Hehl-Lange, Sigrid; Keskin, Berna                                                                                       | Promoting urban greening: Valuing the development of green infrastructure investments in the urban core of Manchester, UK                         | Urban Forestry & Urban Greening | 2013 | Europe        | UK      | Sheffield, UK; Manchester, UK          | economic evaluation    |
| Ng, Wai-Yin; Chau, Chi-Kwan; Powell, Greg; Leung, Tze-Ming                                                                                              | Preferences for street configuration and street tree planting in urban Hong Kong                                                                  | Urban Forestry & Urban Greening | 2015 | Asia          | China   | Hong Kong                              | economic evaluation    |
| Nordman, Erik E.; Isely, Elaine; Isely, Paul; Denning, Rod                                                                                              | Benefit-cost analysis of stormwater green infrastructure practices for Grand Rapids, Michigan, USA                                                | Journal of Cleaner Production   | 2018 | North America | USA     | Grand Rapids, MI                       | economic evaluation    |
| Paine, T. D.; Millar, J. G.; Hanks, L. M.; Gould, J.; Wang, Q.; Daane, K.; Dahlsten, D. L.; Mcpherson, E. G.                                            | Cost-Benefit Analysis for Biological Control Programs That Targeted Insect Pests of Eucalypts in Urban Landscapes of California                   | Journal of Economic Entomology  | 2015 | North America | USA     | Riverside, CA; Orange County Parks, CA | economic evaluation    |

| Author                                                                                | Title                                                                                                                                                      | Journal                               | Year | Continent     | Country     | City/ State                    | Theme/ Topic                            |
|---------------------------------------------------------------------------------------|------------------------------------------------------------------------------------------------------------------------------------------------------------|---------------------------------------|------|---------------|-------------|--------------------------------|-----------------------------------------|
| Pandit, Ram; Polyakov, Maksym; Tapsuwan, Sorada; Moran, Timothy                       | The effect of street trees on property value in Perth, Western Australia                                                                                   | Landscape and Urban Planning          | 2013 | Oceania       | Australia   | Perth, Western Australia       | economic evaluation                     |
| Plant, Lyndal; Rambaldi, Alicia; Sipe, Neil                                           | Evaluating Revealed Preferences for Street Tree Cover Targets: A Business Case for Collaborative Investment in Leafier Streetscapes in Brisbane, Australia | Ecological Economics                  | 2017 | Oceania       | Australia   | Brisbane                       | economic evaluation                     |
| Ryder, C M; Moore, G M                                                                | The Arboricultural and Economic Benefits of Formative Pruning Street Trees                                                                                 | Arboriculture & Urban Forestry        | 2013 | Oceania       | Australia   | Melbourne                      | economic evaluation                     |
| Soares, A.L.; Rego, F.C.; McPherson, E.G.; Simpson, J.R.; Peper, P.J.; Xiao, Q.       | Benefits and costs of street trees in Lisbon, Portugal                                                                                                     | Urban Forestry & Urban Greening       | 2011 | Europe        | Portugal    | Lisbon                         | economic evaluation                     |
| Staats, Henk; Swain, Ritwik                                                           | Cars, trees, and house prices: Evaluation of the residential environment as a function of numbers of cars and trees in the street                          | Urban Forestry & Urban Greening       | 2020 | Europe        | Netherlands | Leiden                         | economic evaluation                     |
| Sydnor, T Davis; Subburayalu, Sakthi K                                                | Should We Consider Expected Environmental Benefits When Planting Larger or Smaller Tree Species?                                                           | Arboriculture & Urban Forestry        | 2011 | North America | USA         | Brooklyn, OH                   | economic evaluation                     |
| Walker, Michael E.; Morera, Osvaldo F.; Vining, Joanne; Orland, Brian                 | Disparate WTA-WTP disparities: The influence of human versus natural causes                                                                                | Journal of Behavioral Decision Making | 1999 | North America | USA         | Champaign and Urbana, Illinois | economic evaluation                     |
| <b>STREET TREE VALUE</b>                                                              |                                                                                                                                                            |                                       |      |               |             |                                |                                         |
| <i>Social Value</i>                                                                   |                                                                                                                                                            |                                       |      |               |             |                                |                                         |
| Ames, Bill; Dewald, Shane                                                             | Working proactively with developers to preserve urban trees                                                                                                | Cities                                | 2003 | North America | USA         | Seattle, WA                    | tree protection (during construction)   |
| Baró, Francesc; Calderón-Argelich, Amalia; Langemeyer, Johannes; Connolly, James J.T. | Under one canopy? Assessing the distributional environmental justice implications of street tree benefits in Barcelona                                     | Environmental Science & Policy        | 2019 | Europe        | Spain       | Barcelona                      | distribution - density                  |
| Barron, Laura; Ruggieri, Dominique; Branas, Charles                                   | Assessing Vulnerability to Heat: A Geospatial Analysis for the City of Philadelphia                                                                        | Urban Science                         | 2018 | North America | USA         | Philadelphia, Pennsylvania     | planning process - prioritization       |
| Basu, Sukanya; Nagendra, Harini                                                       | The street as workspace: Assessing street vendors' rights to trees in Hyderabad, India                                                                     | Landscape and Urban Planning          | 2020 | Asia          | India       | Hyderabad                      | planning process - business improvement |
| Breuste, Jürgen H.                                                                    | Investigations of the Urban Street Tree Forest of Mendoza, Argentina.                                                                                      | Urban Ecosystems                      | 2013 | South America | Argentina   | Mendoza                        | distribution/recognition - density      |

| Author                                                                                                       | Title                                                                                                                                                                              | Journal                         | Year | Continent     | Country  | City/ State                                      | Theme/ Topic                                                  |
|--------------------------------------------------------------------------------------------------------------|------------------------------------------------------------------------------------------------------------------------------------------------------------------------------------|---------------------------------|------|---------------|----------|--------------------------------------------------|---------------------------------------------------------------|
| Carmichael, Christine E., and Maureen H. McDonough                                                           | Community Stories: Explaining Resistance to Street Tree-Planting Programs in Detroit, Michigan, USA                                                                                | Society and Natural Resources   | 2019 | North America | USA      | Detroit, Michigan                                | resident participation                                        |
| Carmichael, Christine E.; McDonough, Maureen H.                                                              | The trouble with trees? Social and political dynamics of street tree-planting efforts in Detroit, Michigan, USA                                                                    | Urban Forestry & Urban Greening | 2018 | North America | USA      | Detroit, MI                                      | resident participation                                        |
| Cheng, Sheauchi; McBride, Joe R.                                                                             | Restoration of the urban forests of Tokyo and Hiroshima following World War II                                                                                                     | Urban Forestry & Urban Greening | 2006 | Asia          | Japan    | Tokyo, Hiroshima                                 | planning process - prioritization                             |
| Cowett, F D                                                                                                  | Methodology for Spatial Analysis of Municipal Street Tree Benefits                                                                                                                 | Arboriculture & Urban Forestry  | 2014 | North America | USA      | Providence, Rhode Island                         | distribution - density                                        |
| de Guzman, Edith; Malarich, Rachel; Large, Lori; Danoff-Burg, Sharon                                         | Inspiring Resident Engagement: Identifying Street Tree Stewardship Participation Strategies in Environmental Justice Communities Using a Community-Based Social Marketing Approach | Arboriculture & Urban Forestry  | 2018 | North America | USA      | Huntington Park (Los Angeles County), California | resident participation                                        |
| Deng, Jinyang; Andrada, Rogelio; Pierskalla, Chad                                                            | Visitors' and residents' perceptions of urban forests for leisure in Washington D.C                                                                                                | Urban Forestry & Urban Greening | 2017 | North America | USA      | Washington, D.C.                                 | tree preferences                                              |
| Doherty, Karen D; Ryan, H Dennis P; Bloniarz, David V                                                        | TREE WARDENS AND UTILITY ARBORISTS: A MANAGEMENT TEAM WORKING FOR STREET TREES IN MASSACHUSETTS                                                                                    | Journal of Arboriculture        | 2000 | North America | USA      | n=168 cities/towns in Massachusetts              | management actors                                             |
| Ferguson, M.; Roberts, H.E.; McEachan, R.R.C.; Dallimer, M.                                                  | Contrasting distributions of urban green infrastructure across social and ethno-racial groups                                                                                      | Landscape and Urban Planning    | 2018 | Europe        | UK       | Bradford                                         | distribution - density                                        |
| Fernandes, Cláudia Oliveira; da Silva, Isabel Martinho; Teixeira, Catarina Patoilo; Costa, Leonardo          | Between tree lovers and tree haters. Drivers of public perception regarding street trees and its implications on the urban green infrastructure planning                           | Urban Forestry & Urban Greening | 2019 | Europe        | Portugal | Porto                                            | tree preferences                                              |
| Flowers, Dana E; Gerhold, Henry D                                                                            | REPLACEMENT OF TREES UNDER UTILITY WIRES IMPACTS ATTITUDES AND COMMUNITY TREE PROGRAMS                                                                                             | Journal of Arboriculture        | 2000 | North America | USA      | n=54 Pennsylvania                                | tree preferences                                              |
| Galenieks, Andrejs                                                                                           | Importance of Urban Street Tree Policies: A Comparison of Neighbouring Southern California Cities                                                                                  | Urban Forestry & Urban Greening | 2017 | North America | USA      | California                                       | planning process - prioritization                             |
| Gill, Susannah E.; Handley, John F.; Ennos, A. Roland; Pauleit, Stephan; Theuray, Nicolas; Lindley, Sarah J. | Characterising the urban environment of UK cities and towns: A template for landscape planning                                                                                     | Landscape and Urban Planning    | 2008 | Europe        | UK       | Manchester                                       | planning process - mapping urban morphology and surface cover |

| Author                                                                                | Title                                                                                                                                                                                      | Journal                             | Year | Continent             | Country      | City/ State                                               | Theme/ Topic                         |
|---------------------------------------------------------------------------------------|--------------------------------------------------------------------------------------------------------------------------------------------------------------------------------------------|-------------------------------------|------|-----------------------|--------------|-----------------------------------------------------------|--------------------------------------|
| Gorman, James                                                                         | RESIDENTS' OPINIONS ON THE VALUE OF STREET TREES DEPENDING ON TREE LOCATION                                                                                                                | Journal of Arboriculture            | 2004 | North America, Europe | USA, UK      | Downer' Grove (Chicago metro); North Somerset, Torbay     | tree preferences                     |
| Gwedla, Nanamhla; Shackleton, Charlie M.                                              | Perceptions and preferences for urban trees across multiple socio-economic contexts in the Eastern Cape, South Africa                                                                      | Landscape and Urban Planning        | 2019 | Africa                | South Africa | 11 Eastern Cape towns                                     | tree preferences                     |
| Gwedla, Nanamhla; Shackleton, Charlie M.                                              | Population size and development history determine street tree distribution and composition within and between Eastern Cape towns, South Africa                                             | Urban Forestry & Urban Greening     | 2017 | Africa                | South Africa | 10 Eastern Cape towns                                     | distribution - density and diversity |
| Gwedla, Nanamhla; Shackleton, Charlie M.                                              | The development visions and attitudes towards urban forestry of officials responsible for greening in South African towns                                                                  | Land Use Policy                     | 2015 | Africa                | South Africa | 24 Eastern Cape towns                                     | management actors                    |
| Heimlich, Joseph; Sydnor, T Davis; Bumgardner, Matthew; O'Brien, Patrick              | Attitudes of Residents Toward Street Trees on Four Streets in Toledo, Ohio, U.S. Before Removal of Ash Trees ( <i>Fraxinus</i> spp.) from Emerald Ash Borer ( <i>Agrilus planipennis</i> ) | Arboriculture & Urban Forestry      | 2008 | North America         | USA          | Toledo, OH                                                | tree preferences                     |
| Hilde, Thomas; Paterson, Robert                                                       | Integrating ecosystem services analysis into scenario planning practice: Accounting for street tree benefits with i-Tree valuation in Central Texas                                        | Journal of Environmental Management | 2014 | North America         | USA          | Hutto, TX                                                 | planning process - scenario planning |
| Hunter, MaryCarol R.                                                                  | Impact of ecological disturbance on awareness of urban nature and sense of environmental stewardship in residential neighborhoods                                                          | Landscape and Urban Planning        | 2011 | North America         | USA          | Ann Arbor, MI                                             | resident participation               |
| Jack-Scott, Emily; Piana, Max; Troxel, Blake; Murphy-Dunning, Colleen; Ashton, Mark S | Stewardship Success: How Community Group Dynamics Affect Urban Street Tree Survival and Growth                                                                                             | Arboriculture & Urban Forestry      | 2013 | North America         | USA          | New Haven, Connecticut                                    | community participation              |
| Kendal, Dave; Williams, Nicholas S.G.; Williams, Kathryn J.H.                         | Drivers of diversity and tree cover in gardens, parks and streetscapes in an Australian city                                                                                               | Urban Forestry & Urban Greening     | 2012 | Oceania               | Australia    | Ballarat                                                  | distribution - density and diversity |
| Kirkpatrick, J. B.; Davison, A.; Daniels, G. D.                                       | Resident attitudes towards trees influence the planting and removal of different types of trees in eastern Australian cities                                                               | Landscape and Urban Planning        | 2012 | Oceania               | Australia    | Townsville, Brisbane, Sydney, Adelaide, Melbourne, Hobart | tree preferences                     |

| Author                                                                      | Title                                                                                                                                                          | Journal                                  | Year | Continent             | Country   | City/ State                                               | Theme/ Topic                         |
|-----------------------------------------------------------------------------|----------------------------------------------------------------------------------------------------------------------------------------------------------------|------------------------------------------|------|-----------------------|-----------|-----------------------------------------------------------|--------------------------------------|
| Kirkpatrick, J.B.; Daniels, G.D.; Davison, A.                               | Temporal and spatial variation in garden and street trees in six eastern Australian cities                                                                     | Landscape and Urban Planning             | 2011 | Oceania               | Australia | Townsville, Brisbane, Sydney, Adelaide, Melbourne, Hobart | distribution - density               |
| Kolosna, Carl; Spurlock, Danielle                                           | Uniting geospatial assessment of neighborhood urban tree canopy with plan and ordinance evaluation for environmental justice                                   | Urban Forestry & Urban Greening          | 2019 | North America         | USA       | Durham and Chapel Hill, North Carolina                    | distribution/recognition - density   |
| Konijnendijk, Cecil C.; Ricard, Robert M.; Kenney, Andy; Randrup, Thomas B. | Defining urban forestry – A comparative perspective of North America and Europe                                                                                | Urban Forestry & Urban Greening          | 2006 | North America, Europe | n/a       |                                                           | institutional discourse              |
| Kronenberg, Jakub                                                           | Why not to green a city? Institutional barriers to preserving urban ecosystem services                                                                         | Ecosystem Services                       | 2015 | Europe                | Poland    |                                                           | management actors                    |
| Łaskiewicz, Edyta; Sikorska, Daria                                          | Children's green walk to school: An evaluation of welfare-related disparities in the visibility of greenery among children                                     | Environmental Science & Policy           | 2020 | Europe                | Poland    | Lodz                                                      | distribution - density               |
| Laurian, Lucie                                                              | Planning for Street Trees and Human–Nature Relations: Lessons from 600 Years of Street Tree Planting in Paris                                                  | Journal of Planning History              | 2019 | Europe                | France    | Paris                                                     | tree preferences                     |
| <i>Li, Ying Ying, Xiang Rong Wang, and Cheng Lin Huang</i>                  | Key Street Tree Selection in Urban Areas                                                                                                                       | African Journal of Agricultural Research | 2011 | Asia                  | China     | Hefei                                                     | planning process - species selection |
| Locke, Dexter H                                                             | Why opt-in to a planting program? Long-term residents value street tree aesthetics                                                                             | Arboriculture & Urban Forestry           | 2015 | North America         | USA       | New Haven, Connecticut                                    | resident participation               |
| Lusk, Anne C.; da Silva Filho, Demóstenes Ferreira; Dobbert, Lea            | Pedestrian and cyclist preferences for tree locations by sidewalks and cycle tracks and associated benefits: Worldwide implications from a study in Boston, MA | Cities                                   | 2018 | North America         | USA       | Boston, MA                                                | tree preferences                     |
| Marshall, Adrian J.; Grose, Margaret J.; Williams, Nicholas S.G.            | Footpaths, tree cut-outs and social contagion drive citizen greening in the road verge                                                                         | Urban Forestry & Urban Greening          | 2019 | Oceania               | Australia | Melbourne                                                 | resident participation               |
| Marshall, Adrian J.; Grose, Margaret J.; Williams, Nicholas S.G.            | Of mowers and growers: Perceived social norms strongly influence verge gardening, a distinctive civic greening practice                                        | Landscape and Urban Planning             | 2020 | Oceania               | Australia | Melbourne                                                 | resident participation               |

| Author                                                                                                                    | Title                                                                                                                            | Journal                                                               | Year | Continent     | Country   | City/ State                                       | Theme/ Topic                         |
|---------------------------------------------------------------------------------------------------------------------------|----------------------------------------------------------------------------------------------------------------------------------|-----------------------------------------------------------------------|------|---------------|-----------|---------------------------------------------------|--------------------------------------|
| McBride, Joe R.; Laćan, Igor                                                                                              | The impact of climate-change induced temperature increases on the suitability of street tree species in California (USA) cities  | Urban Forestry & Urban Greening                                       | 2018 | North America | USA       | 16 cities in California                           | planning process - prioritization    |
| Moskell, Christine; Allred, Shorna Broussard                                                                              | Residents' beliefs about responsibility for the stewardship of park trees and street trees in New York City                      | Landscape and Urban Planning                                          | 2013 | North America | USA       | New York, New York                                | resident participation               |
| Moskell, Christine; Bassuk, Nina; Allred, Shorna; MacRae, Pat                                                             | Engaging Residents in Street Tree Stewardship: Results of a Tree Watering Outreach Intervention                                  | Arboriculture & Urban Forestry                                        | 2016 | North America | USA       | Ithaca, New York                                  | resident participation               |
| Nitoslawski, Sophie A.; Steenberg, James W.; Duinker, Peter N.; Bush, Peter G.                                            | Assessing the influence of location attributes on urban forest species composition in suburban neighbourhoods                    | Urban Forestry & Urban Greening                                       | 2017 | North America | Canada    | Halifax, Nova Scotia, and London, Ontario         | distribution - density and diversity |
| Norton, Briony A.; Coutts, Andrew M.; Livesley, Stephen J.; Harris, Richard J.; Hunter, Annie M.; Williams, Nicholas S.G. | Planning for cooler cities: A framework to prioritise green infrastructure to mitigate high temperatures in urban landscapes     | Landscape and Urban Planning                                          | 2015 | Oceania       | Australia | Melbourne                                         | planning process - prioritization    |
| Pauleit, Stephan                                                                                                          | Urban street tree plantings: Identifying the key requirements                                                                    | Proceedings of the Institution of Civil Engineers: Municipal Engineer | 2003 | Europe        | n/a       | n/a                                               | management actors                    |
| Peckham, Shawna C.; Duinker, Peter N.; Ordóñez, Camilo                                                                    | Urban forest values in Canada: Views of citizens in Calgary and Halifax                                                          | Urban Forestry & Urban Greening                                       | 2013 | North America | Canada    | Calgary and Halifax                               | tree preferences                     |
| Petri, Aaron C.; Wilson, Bev; Koeser, Andrew                                                                              | Planning the urban forest: Adding microclimate simulation to the planner's toolkit                                               | Land Use Policy                                                       | 2019 | North America | USA       | Chicago, Illinois                                 | planning process: heat mitigation    |
| Pham, Thi-Thanh-Hien; Apparicio, Philippe; Landry, Shawn; Lewnard, Joseph                                                 | Disentangling the effects of urban form and socio-demographic context on street tree cover: A multi-level analysis from Montréal | Landscape and Urban Planning                                          | 2017 | North America | Canada    | Montreal, Quebec                                  | distribution - density               |
| Pham, Thi-Thanh-Hien; Apparicio, Philippe; Landry, Shawn; Séguin, Anne-Marie; Gagnon, Martin                              | Predictors of the distribution of street and backyard vegetation in Montreal, Canada                                             | Urban Forestry & Urban Greening                                       | 2013 | North America | Canada    | Montreal, Quebec                                  | distribution - density               |
| Pryor, Matthew Robert                                                                                                     | Street Tree Planting in Hong Kong in the Early Colonial Period (1842-98)                                                         | Journal of the Royal Asiatic Society Hong Kong Branch                 | 2015 | Asia          | China     | Hong Kong                                         | tree preferences                     |
| Roy, Sudipto; Davison, Aidan; Östberg, Johan                                                                              | Pragmatic factors outweigh ecosystem service goals in street tree selection and planting in South-East Queensland cities         | Urban Forestry & Urban Greening                                       | 2017 | Oceania       | Australia | Brisbane, Gold Coast, Logan, Ipswich, and Redland | tree preferences                     |

| Author                                                                                                                                                                                                                                     | Title                                                                                                      | Journal                             | Year | Continent             | Country                                      | City/ State                                                             | Theme/ Topic                         |
|--------------------------------------------------------------------------------------------------------------------------------------------------------------------------------------------------------------------------------------------|------------------------------------------------------------------------------------------------------------|-------------------------------------|------|-----------------------|----------------------------------------------|-------------------------------------------------------------------------|--------------------------------------|
| Sæbø, Arne; Benedikz, Thorarinn; Randrup, Thomas B.                                                                                                                                                                                        | Selection of trees for urban forestry in the Nordic countries                                              | Urban Forestry & Urban Greening     | 2003 | Europe                | Denmark, Finland, Iceland, Norway and Sweden | n/a                                                                     | planning process - prioritization    |
| Scharenbroch, Bryant C.; Carter, David; Bialecki, Margaret; Fahey, Robert; Scheberl, Luke; Catania, Michelle; Roman, Lara A.; Bassuk, Nina; Harper, Richard W.; Werner, Les; Siewert, Alan; Miller, Stephanie; Hutyra, Lucy; Raciti, Steve | A rapid urban site index for assessing the quality of street tree planting sites                           | Urban Forestry & Urban Greening     | 2017 | North America         | USA                                          | Boston, MA; Chicago, IL; Cleveland, OH; Springfield, MA and Toledo, OH. | planning process - prioritization    |
| Schroeder, Herbert; Flannigan, John; Coles, Richard                                                                                                                                                                                        | Residents' Attitudes Toward Street Trees in the UK and U.S. Communities                                    | Journal of Arboriculture            | 2006 | North America, Europe | USA, UK                                      | Downers Grove IL (USA), Torbay (UK), North Somerset (UK)                | tree preferences                     |
| Seburanga, J.L.; Kaplin, B.A.; Zhang, Q.-X.; Gatesire, T.                                                                                                                                                                                  | Amenity trees and green space structure in urban settlements of Kigali, Rwanda                             | Urban Forestry & Urban Greening     | 2014 | Africa                | Rwanda                                       | Kigali                                                                  | management actors                    |
| Shams, Zafar Iqbal; Shahid, Mubah; Nadeem, Zara; Naz, Shafaq; Raheel, Dania; Aftab, Darakshan; Fraz, Tayyab Raza; Roomi, Muhammad Sohaib                                                                                                   | Town socio-economic status and road width determine street tree density and diversity in Karachi, Pakistan | Urban Forestry & Urban Greening     | 2020 | Asia                  | Pakistan                                     | Karachi                                                                 | distribution - density and diversity |
| Silvera Seamans, Georgia                                                                                                                                                                                                                   | Mainstreaming the environmental benefits of street trees                                                   | Urban Forestry & Urban Greening     | 2013 | North America         | USA                                          | Sacramento, Palo Alto, San Francisco, CA                                | institutional discourse              |
| Stevenson, Tyler R; Gerhold, Henry D; Elmendorf, William F                                                                                                                                                                                 | Attitudes of Municipal Officials Toward Street Tree Programs in Pennsylvania, U.S.                         | Arboriculture & Urban Forestry      | 2008 | North America         | USA                                          | n = 356, PA                                                             | management actors                    |
| Todorova, Assenna; Asakawa, Shoichiro; Aikoh, Tetsuya                                                                                                                                                                                      | Preferences for and attitudes towards street flowers and trees in Sapporo, Japan                           | Landscape and Urban Planning        | 2004 | Africa                | South Africa                                 | n=10 towns                                                              | tree preferences                     |
| Watkins, Shannon Lea; Gerrish, Ed                                                                                                                                                                                                          | The relationship between urban forests and race: A meta-analysis                                           | Journal of Environmental Management | 2018 | n/a                   | n/a                                          | n/a                                                                     | distribution/recognition - density   |
| Williams, Kathryn                                                                                                                                                                                                                          | Exploring resident preferences for street trees in Melbourne, Australia                                    | Journal of Arboriculture            | 2002 | Oceania               | Australia                                    | Melbourne                                                               | tree preferences                     |
